# Supplementary material for: A Network Meta-Analysis of Long-Acting Muscarinic Antagonist (LAMA) and Long-Acting β2-Agonist (LABA) Combinations in COPD
Source: Springer Nature journal article supplement (doi:10.1007/s41030-017-0048-0), 2017-08-22
Supplement: MOESM1 [file 24441184]

## A Network Meta-Analysis of Long-Acting Muscarinic Antagonist (LAMA) and Long-Acting $\beta_2$ -Agonist (LABA) Combinations in COPD – supplementary materials

### Supplementary Table S1: Bibliographic Search Strategies

**Table S1.1. Search strategy for the systematic review: MEDLINE and MEDLINE In-Process**

|                       |                                                                                                                                                                                                                                                                                                                                                                                                                                                                                                                                               |                |
|-----------------------|-----------------------------------------------------------------------------------------------------------------------------------------------------------------------------------------------------------------------------------------------------------------------------------------------------------------------------------------------------------------------------------------------------------------------------------------------------------------------------------------------------------------------------------------------|----------------|
| <b>Database</b>       | MEDLINE(R) In-Process & Other Non-Indexed Citations and MEDLINE(R)                                                                                                                                                                                                                                                                                                                                                                                                                                                                            |                |
| <b>Platform</b>       | Ovid                                                                                                                                                                                                                                                                                                                                                                                                                                                                                                                                          |                |
| <b>Date of search</b> | 2 Oct 2015                                                                                                                                                                                                                                                                                                                                                                                                                                                                                                                                    |                |
| <b>Time limits</b>    | 1946 to 2015 week 39                                                                                                                                                                                                                                                                                                                                                                                                                                                                                                                          |                |
| <b>Filters</b>        | Line 6 - 15 are from the search filter: Cochrane Highly Sensitive Search Strategy for identifying randomized trials in MEDLINE: sensitivity- and precision-maximizing version (2008 revision); Ovid format. Available from: <a href="http://handbook.cochrane.org/chapter_6/box_6.4.d_cochrane_hsss_2008_sens_prec_ovid.htm">http://handbook.cochrane.org/chapter_6/box_6.4.d_cochrane_hsss_2008_sens_prec_ovid.htm</a> (accessed 2 Oct 2015)                                                                                                 |                |
| <b>#</b>              | <b>Searches</b>                                                                                                                                                                                                                                                                                                                                                                                                                                                                                                                               | <b>Results</b> |
| 1                     | (formoterol or eformoterol or foradil or oxis or atimos modulite or atock or perforomist or salmeterol or serevent or tiotropium or spiriva or Ba 679 BR or indacaterol or onbrez or arcapta or NVA-237 or NVA237 or (NVA adj "237") or glycopyrronium or glycopyrrolate or seebri or enurev breezhaler or aclidinium or tudorza pressair or eklira genuair or symbicort or advair or seretide or olodaterol or striverdi or umeclidinium or GSK573719 or vilanterol or GW642444 or QVA149 or relovair or zephyr or anoro ellipta). ti,ab,nm. | 6157           |
| 2                     | exp Pulmonary Disease, Chronic Obstructive/ or exp Chronic obstructive lung disease/                                                                                                                                                                                                                                                                                                                                                                                                                                                          | 40019          |
| 3                     | (COPD or chronic obstructive pulmonary disease or COAD or chronic obstructive airway disease or chronic obstructive lung disease or chronic bronchitis or emphysema).ti,ab.                                                                                                                                                                                                                                                                                                                                                                   | 67176          |
| 4                     | 2 or 3                                                                                                                                                                                                                                                                                                                                                                                                                                                                                                                                        | 76919          |
| 5                     | 1 and 4                                                                                                                                                                                                                                                                                                                                                                                                                                                                                                                                       | 1962           |
| 6                     | randomized controlled trial.pt.                                                                                                                                                                                                                                                                                                                                                                                                                                                                                                               | 411493         |
| 7                     | controlled clinical trial.pt.                                                                                                                                                                                                                                                                                                                                                                                                                                                                                                                 | 91674          |
| 8                     | randomized.ab.                                                                                                                                                                                                                                                                                                                                                                                                                                                                                                                                | 333334         |
| 9                     | placebo.ab.                                                                                                                                                                                                                                                                                                                                                                                                                                                                                                                                   | 168050         |
| 10                    | clinical trials as topic.sh.                                                                                                                                                                                                                                                                                                                                                                                                                                                                                                                  | 178669         |
| 11                    | randomly.ab.                                                                                                                                                                                                                                                                                                                                                                                                                                                                                                                                  | 240412         |
| 12                    | trial.ti.                                                                                                                                                                                                                                                                                                                                                                                                                                                                                                                                     | 146789         |
| 13                    | or/6-12                                                                                                                                                                                                                                                                                                                                                                                                                                                                                                                                       | 997637         |
| 14                    | exp animals/ not humans.sh.                                                                                                                                                                                                                                                                                                                                                                                                                                                                                                                   | 4116467        |

|    |                                 |        |
|----|---------------------------------|--------|
| 15 | 13 not 14                       | 920230 |
| 16 | 5 and 15                        | 985    |
| 17 | limit 16 to (English or German) | 933    |

ab, nm, pt, sh, ti: searches performed in abstract, name of substance, publication type, subject heading and title fields, respectively

**Table S1.2 Search strategy for the systematic review: EMBASE**

|                       |                                                                                                                                                                                                                                                                                                                                                                                                                                                                                                                                            |                |
|-----------------------|--------------------------------------------------------------------------------------------------------------------------------------------------------------------------------------------------------------------------------------------------------------------------------------------------------------------------------------------------------------------------------------------------------------------------------------------------------------------------------------------------------------------------------------------|----------------|
| <b>Database</b>       | EMBASE                                                                                                                                                                                                                                                                                                                                                                                                                                                                                                                                     |                |
| <b>Platform</b>       | Ovid                                                                                                                                                                                                                                                                                                                                                                                                                                                                                                                                       |                |
| <b>Date of search</b> | 2 Oct 2015                                                                                                                                                                                                                                                                                                                                                                                                                                                                                                                                 |                |
| <b>Time limits</b>    | 1988 to 2015 week 39                                                                                                                                                                                                                                                                                                                                                                                                                                                                                                                       |                |
| <b>Filters</b>        | Line 6 - 10 are from the search filter: Cochrane search terms used to identify EMBASE reports of randomized trials for inclusion in CENTRAL; Ovid format.<br>Available from:<br><a href="http://handbook.cochrane.org/chapter_6/6_3_2_2_what_is_in_the_cochrane_central_register_of_controlled.htm">http://handbook.cochrane.org/chapter_6/6_3_2_2_what_is_in_the_cochrane_central_register_of_controlled.htm</a> (accessed 2 Oct 2015)                                                                                                    |                |
| <b>#</b>              | <b>Searches</b>                                                                                                                                                                                                                                                                                                                                                                                                                                                                                                                            | <b>Results</b> |
| 1                     | (formoterol or eformoterol or foradil or oxis or atimos modulite or atock or perforomist or salmeterol or serevent or tiotropium or spiriva or Ba 679 BR or indacaterol or onbrez or arcapta or NVA-237 or NVA237 or (NVA adj "237") or glycopyrronium or glycopyrrolate or seebri or enurev breezhaler or acclidinium or tudorza pressair or eklira genuair or symbicort or advair or seretide or olodaterol or striverdi or umeclidinium or GSK573719 or vilanterol or GW642444 or QVA149 or relovair or zephyr or anoro ellipta).ti,ab. | 8350           |
| 2                     | exp Pulmonary Disease, Chronic Obstructive/ or exp Chronic obstructive lung disease/                                                                                                                                                                                                                                                                                                                                                                                                                                                       | 75097          |
| 3                     | (COPD or chronic obstructive pulmonary disease or COAD or chronic obstructive airway disease or chronic obstructive lung disease or chronic bronchitis or emphysema).ti,ab.                                                                                                                                                                                                                                                                                                                                                                | 82739          |
| 4                     | 2 or 3                                                                                                                                                                                                                                                                                                                                                                                                                                                                                                                                     | 108091         |
| 5                     | 1 and 4                                                                                                                                                                                                                                                                                                                                                                                                                                                                                                                                    | 3377           |
| 6                     | (random\$ or factorial\$ or crossover\$ or cross over\$ or cross-over\$ or placebo\$ or (doubl\$ adj blind\$) or (singl\$ adj blind\$) or assign\$ or allocat\$ or volunteer\$).ti,ab.                                                                                                                                                                                                                                                                                                                                                     | 1421388        |
| 7                     | crossover-procedure/ or double-blind procedure/ or randomized controlled trial/ or single-blind procedure/                                                                                                                                                                                                                                                                                                                                                                                                                                 | 412881         |
| 8                     | 6 or 7                                                                                                                                                                                                                                                                                                                                                                                                                                                                                                                                     | 1498478        |
| 9                     | 5 and 8                                                                                                                                                                                                                                                                                                                                                                                                                                                                                                                                    | 1700           |
| 10                    | limit 9 to (English or German)                                                                                                                                                                                                                                                                                                                                                                                                                                                                                                             | 1651           |

**Table S1.3. Search strategy for the systematic review: Cochrane CENTRAL**

| <b>Database</b>       | Cochrane CENTRAL                                                                                                                                                                                                                                                                                                                                                                                                                                                                                                                            |         |
|-----------------------|---------------------------------------------------------------------------------------------------------------------------------------------------------------------------------------------------------------------------------------------------------------------------------------------------------------------------------------------------------------------------------------------------------------------------------------------------------------------------------------------------------------------------------------------|---------|
| <b>Platform</b>       | Ovid                                                                                                                                                                                                                                                                                                                                                                                                                                                                                                                                        |         |
| <b>Date of search</b> | 2 Oct 2015                                                                                                                                                                                                                                                                                                                                                                                                                                                                                                                                  |         |
| <b>Time limits</b>    | 1988 to 2015                                                                                                                                                                                                                                                                                                                                                                                                                                                                                                                                |         |
| <b>Filters</b>        | n.a.                                                                                                                                                                                                                                                                                                                                                                                                                                                                                                                                        |         |
| #                     | Searches                                                                                                                                                                                                                                                                                                                                                                                                                                                                                                                                    | Results |
| 1                     | (formoterol or eformoterol or foradil or oxis or atimos modulite or atock or perfromist or salmeterol or serevent or tiotropium or spiriva or Ba 679 BR or indacaterol or onbrez or arcapta or NVA-237 or NVA237 or (NVA adj "237") or glycopyrronium or glycopyrrolate or seebri or enurev breezhaler or aclidinium or tudorza pressair or eklira genuair or symbicort or advair or seretide or olodaterol or striverdi or umeclidinium or GSK573719 or vilanterol or GW642444 or QVA149 or relovair or zephyr or anoro ellipta).ti,ab,kw. | 4995    |
| 2                     | Exp Pulmonary Disease, Chronic Obstructive/                                                                                                                                                                                                                                                                                                                                                                                                                                                                                                 | 2100    |
| 3                     | (COPD or chronic obstructive pulmonary disease or COAD or chronic obstructive airway disease or chronic obstructive lung disease or chronic bronchitis or emphysema).ti,ab,kw.                                                                                                                                                                                                                                                                                                                                                              | 10562   |
| 4                     | 1 and (2 or 3)                                                                                                                                                                                                                                                                                                                                                                                                                                                                                                                              | 1810    |

ab, kw, ti: searches performed in abstract, keyword and title fields, respectively;

**Table S1.4. Search strategy for the systematic review: Cochrane CDSR**

| <b>Database</b>       | Cochrane CDSR                                                                                                                                                                                                                                                                                                                                                                                                                                                                                                                                                |         |
|-----------------------|--------------------------------------------------------------------------------------------------------------------------------------------------------------------------------------------------------------------------------------------------------------------------------------------------------------------------------------------------------------------------------------------------------------------------------------------------------------------------------------------------------------------------------------------------------------|---------|
| <b>Platform</b>       | Ovid                                                                                                                                                                                                                                                                                                                                                                                                                                                                                                                                                         |         |
| <b>Date of search</b> | 2 Oct 2015                                                                                                                                                                                                                                                                                                                                                                                                                                                                                                                                                   |         |
| <b>Time limits</b>    | 1988 to 2014                                                                                                                                                                                                                                                                                                                                                                                                                                                                                                                                                 |         |
| <b>Filters</b>        | n.a.                                                                                                                                                                                                                                                                                                                                                                                                                                                                                                                                                         |         |
| #                     | Searches                                                                                                                                                                                                                                                                                                                                                                                                                                                                                                                                                     | Results |
| 1                     | (formoterol or eformoterol or foradil or oxis or atimos modulite or atock or perfromist or salmeterol or serevent or tiotropium or spiriva or Ba 679 BR or indacaterol or onbrez or arcapta or NVA-237 or NVA237 or (NVA near/3 237) or glycopyrronium bromide or glycopyrrolate or seebri or enurev breezhaler or aclidinium bromide or tudorza pressair or eklira genuair or symbicort or advair or seretide or olodaterol or striverdi or umeclidinium or GSK573719 or vilanterol or GW642444 or QVA149 or relovair or zephyr or anoro ellipta).ti,ab,kw. | 47      |
| 2                     | (COPD or chronic obstructive pulmonary disease or COAD or chronic obstructive airway disease or chronic obstructive lung disease or chronic bronchitis or emphysema).ti,ab,kw.                                                                                                                                                                                                                                                                                                                                                                               | 131     |
| 3                     | 1 and 2                                                                                                                                                                                                                                                                                                                                                                                                                                                                                                                                                      | 23      |

ab, kw, ti: searches performed in abstract, keyword and title fields, respectively;

**Table S1.5 Search strategy for the systematic review: DARE Database**

| <b>Database</b>       | DARE                                                                                                                                                                                                                                                                                                                                                                                                                                                                                                                                                        |         |
|-----------------------|-------------------------------------------------------------------------------------------------------------------------------------------------------------------------------------------------------------------------------------------------------------------------------------------------------------------------------------------------------------------------------------------------------------------------------------------------------------------------------------------------------------------------------------------------------------|---------|
| <b>Platform</b>       | Ovid                                                                                                                                                                                                                                                                                                                                                                                                                                                                                                                                                        |         |
| <b>Date of search</b> | 2 Oct 2015                                                                                                                                                                                                                                                                                                                                                                                                                                                                                                                                                  |         |
| <b>Time limits</b>    | No time limits                                                                                                                                                                                                                                                                                                                                                                                                                                                                                                                                              |         |
| <b>Filters</b>        | n.a.                                                                                                                                                                                                                                                                                                                                                                                                                                                                                                                                                        |         |
| #                     | Searches                                                                                                                                                                                                                                                                                                                                                                                                                                                                                                                                                    | Results |
| 1                     | (formoterol or eformoterol or foradil or oxis or atimos modulite or atock or performist or salmeterol or serevent or tiotropium or spiriva or Ba 679 BR or indacaterol or onbrez or arcapta or NVA-237 or NVA237 or (NVA and "237") or glycopyrronium bromide or glycopyrrolate or seebri or enurev breezhaler or aclidinium bromide or tudorza pressair or eklira genuair or symbicort or advair or seretide or olodaterol or striverdi or umeclidinium or GSK573719 or vilanterol or GW642444 or QVA149 or relovair or zephyr or anoro ellipta).ti,kw,ft. | 82      |
| 2                     | (COPD or chronic obstructive pulmonary disease or COAD or chronic obstructive airway disease or chronic obstructive lung disease or chronic bronchitis or emphysema).ti,kw,ft                                                                                                                                                                                                                                                                                                                                                                               | 397     |
| 3                     | 1 and 2                                                                                                                                                                                                                                                                                                                                                                                                                                                                                                                                                     | 47      |

ti, kw, ft: searches performed in title, keyword and full text, respectively.

**Table S1.6. Search strategy for the systematic review: Health Technology Assessment Database**

| <b>Database</b>       | HTA                                                                                                                                                                                                                                                                                                                                                                                                                                                                                                                                                   |         |
|-----------------------|-------------------------------------------------------------------------------------------------------------------------------------------------------------------------------------------------------------------------------------------------------------------------------------------------------------------------------------------------------------------------------------------------------------------------------------------------------------------------------------------------------------------------------------------------------|---------|
| <b>Platform</b>       | Ovid                                                                                                                                                                                                                                                                                                                                                                                                                                                                                                                                                  |         |
| <b>Date of search</b> | 2 Oct 2015                                                                                                                                                                                                                                                                                                                                                                                                                                                                                                                                            |         |
| <b>Time limits</b>    | No time limits                                                                                                                                                                                                                                                                                                                                                                                                                                                                                                                                        |         |
| <b>Filters</b>        | n.a.                                                                                                                                                                                                                                                                                                                                                                                                                                                                                                                                                  |         |
| #                     | Searches                                                                                                                                                                                                                                                                                                                                                                                                                                                                                                                                              | Results |
| 1                     | (formoterol or eformoterol or foradil or oxis or atimos modulite or atock or performist or salmeterol or serevent or tiotropium or spiriva or Ba 679 BR or indacaterol or onbrez or arcapta or NVA-237 or NVA237 or (NVA and "237") or glycopyrronium bromide or glycopyrrolate or seebri or enurev breezhaler or aclidinium bromide or tudorza pressair or eklira genuair or symbicort or advair or seretide or olodaterol or striverdi or umeclidinium or GSK573719 or vilanterol or GW642444 or QVA149 or relovair or zephyr or anoro ellipta).mp. | 33      |
| 2                     | (COPD or chronic obstructive pulmonary disease or COAD or chronic obstructive airway disease or chronic obstructive lung disease or chronic bronchitis or emphysema).mp.                                                                                                                                                                                                                                                                                                                                                                              | 145     |
| 3                     | Exp Pulmonary Disease, Chronic Obstructive/                                                                                                                                                                                                                                                                                                                                                                                                                                                                                                           | 118     |
| 4                     | 1 and (2 or 3)                                                                                                                                                                                                                                                                                                                                                                                                                                                                                                                                        | 29      |

mp: searches performed in any field.

## Supplementary Table S2: Registry Search Strategies

**Table S2.1 Search strategy for Clinicaltrials.gov**

|                        |                                                                                                                                                                                              |
|------------------------|----------------------------------------------------------------------------------------------------------------------------------------------------------------------------------------------|
| <b>Trial registry</b>  | clinicaltrials.gov                                                                                                                                                                           |
| <b>URL</b>             | <a href="http://www.clinicaltrials.gov/">http://www.clinicaltrials.gov/</a>                                                                                                                  |
| <b>Date of search</b>  | 2 Oct 2015                                                                                                                                                                                   |
| <b>Search strategy</b> | COPD OR COAD OR “Chronic obstructive pulmonary disease” OR “Chronic obstructive lung disease” OR “chronic obstructive airway disease” OR “chronic bronchitis” OR “emphysema”   Phase 2, 3, 4 |
| <b>Results</b>         | 1252                                                                                                                                                                                         |

**Table S2.2. Search strategy for World Health Organization International Clinical Trials Registry Platform**

|                        |                                                                                                                                                                    |
|------------------------|--------------------------------------------------------------------------------------------------------------------------------------------------------------------|
| <b>Trial registry</b>  | WHO International Clinical Trials Registry Platform (ICTRP)                                                                                                        |
| <b>URL</b>             | <a href="http://apps.who.int/trialsearch/AdvSearch.aspx">http://apps.who.int/trialsearch/AdvSearch.aspx</a>                                                        |
| <b>Date of search</b>  | 2 Oct 2015                                                                                                                                                         |
| <b>Search strategy</b> | COPD OR chronic obstructive pulmonary disease OR COAD OR chronic obstructive airway disease OR chronic obstructive lung disease OR chronic bronchitis OR emphysema |
| <b>Results</b>         | 3689                                                                                                                                                               |

\*The WHO ICTRP imports records from several registries. Trials are sometimes recorded in more than one registry. These records can refer to each other using a secondary identification number. The search portal uses this secondary identification number to group records about the same trial together in the search results.

All results were reported in an excel database. However, WHO ICTRP also collects data from Asian registries. As non-Caucasian population is an exclusion criterion, trials listed on national non-Caucasian registries were excluded for population not of interest. (i.e. Chinese Clinical Trial Registry; Clinical Trials Registry (ChiCTR) – India (CTRI); Iranian Registry of Clinical Trials; Japan Primary Registries Network).

**Table S2.3. Search strategy for Current Controlled Trials**

|                        |                                                                                                                       |
|------------------------|-----------------------------------------------------------------------------------------------------------------------|
| <b>Trial registry</b>  | Current controlled trials                                                                                             |
| <b>URL</b>             | <a href="http://www.controlled-trials.com/editAdvancedSearch">http://www.controlled-trials.com/editAdvancedSearch</a> |
| <b>Date of search</b>  | 8 Oct 2015                                                                                                            |
| <b>Search strategy</b> | (Chronic obstructive pulmonary disease) in Condition                                                                  |
| <b>Results</b>         | 159                                                                                                                   |

ClinicalTrials.gov was removed from the list of resources searched in this aggregated database, as clinicaltrials.gov was searched directly in a separate search.

**Table S2.4. Search strategy for EU Clinical Trials Register**

|                        |                                                                                                                                                                                                                                   |
|------------------------|-----------------------------------------------------------------------------------------------------------------------------------------------------------------------------------------------------------------------------------|
| <b>Trial registry</b>  | EU Clinical Trials Register (EU-CTR)                                                                                                                                                                                              |
| <b>URL</b>             | <a href="http://www.clinicaltrialsregister.eu">www.clinicaltrialsregister.eu</a>                                                                                                                                                  |
| <b>Date of search</b>  | 8 Oct 2015                                                                                                                                                                                                                        |
| <b>Search strategy</b> | (COPD OR chronic obstructive pulmonary disease OR COAD OR chronic obstructive airway disease OR chronic obstructive lung disease OR chronic bronchitis OR emphysema) AND (Phase II OR Phase III or Phase IV [Select trial phase]) |
| <b>Results</b>         | 354                                                                                                                                                                                                                               |

**Table S2.5. Search strategy for Klinische Prüfungen PharmNet.Bund**

|                        |                                                                                                                                                           |
|------------------------|-----------------------------------------------------------------------------------------------------------------------------------------------------------|
| <b>Trial registry</b>  | Klinische Prüfungen PharmNet.Bund                                                                                                                         |
| <b>URL</b>             | <a href="http://www.pharmnet-bund.de/dynamic/de/klinische-pruefungen/index.htm">http://www.pharmnet-bund.de/dynamic/de/klinische-pruefungen/index.htm</a> |
| <b>Date of search</b>  | 8 Oct 2015                                                                                                                                                |
| <b>Search strategy</b> | COPD in Textfelder                                                                                                                                        |
| <b>Results</b>         | 201                                                                                                                                                       |

**Table S2.6. Search strategy for International Prospective Register of Systematic Reviews\***

|                        |                                                                                                                                                                                                                         |
|------------------------|-------------------------------------------------------------------------------------------------------------------------------------------------------------------------------------------------------------------------|
| <b>Trial registry</b>  | International Prospective Register of Systematic Reviews (PROSPERO)                                                                                                                                                     |
| <b>URL</b>             | <a href="http://www.crd.york.ac.uk/prospero/search.asp">http://www.crd.york.ac.uk/prospero/search.asp</a>                                                                                                               |
| <b>Date of search</b>  | 8 Oct 2015                                                                                                                                                                                                              |
| <b>Search strategy</b> | Separate searches for: COPD [ALL FIELDS] or chronic obstructive pulmonary disease [ALL FIELDS] or COAD [ALL FIELDS] or chronic obstructive airway disease [ALL FIELDS] or chronic obstructive lung disease [ALL FIELDS] |
| <b>Results</b>         | 166                                                                                                                                                                                                                     |

\*Please note that each search term has to be searched for manually, and then any duplicates removed at the end.

**Table S2.7. Search strategy for NIHR Health Technology Assessment**

|                        |                                                                                       |
|------------------------|---------------------------------------------------------------------------------------|
| <b>Trial registry</b>  | National Institute for Health Research - Health Technology Assessment (NIHR HTA)      |
| <b>URL</b>             | <a href="http://www.nets.nihr.ac.uk/projects">http://www.nets.nihr.ac.uk/projects</a> |
| <b>Date of search</b>  | 8 Oct 2015                                                                            |
| <b>Search strategy</b> | COPD [Keywords] and HTA [programme] in the advanced search                            |
| <b>Results</b>         | 17                                                                                    |

**Supplementary Table S3: Key characteristics of all studies included in the NMA (arms of interest only)**

| Study                                     | Treatment                                                        | Trial duration | Inclusion criteria                                                                                                                                                                     | Background treatment                                                                                                                                                                                                 |
|-------------------------------------------|------------------------------------------------------------------|----------------|----------------------------------------------------------------------------------------------------------------------------------------------------------------------------------------|----------------------------------------------------------------------------------------------------------------------------------------------------------------------------------------------------------------------|
| <b>DB2113373[1-3]<br/>(NCT01313650)</b>   | UMEC/VI 62.5/25 mcg OD<br><br>Placebo                            | 24 weeks       | Outpatient; ≥40 years of age; smoking history ≥10 pack-years; diagnosed with COPD; post-salbutamol FEV <sub>1</sub> /FVC ratio of <0.70 and a post-salbutamol FEV <sub>1</sub> of ≤70% | Allowed: ICS at a dose of up to 1000 mcg/day of FP or equivalent, salbutamol/albuterol as rescue<br><br>Not allowed: LABAs, ICS/LABA combinations, SABAs, SAMAs, ICS/SABA combinations                               |
| <b>DB2113374[4-6]<br/>(NCT01316913)</b>   | UMEC/VI 62.5/25 mcg OD<br>UMEC/VI 125/25 mcg OD<br>TIO 18 mcg OD | 24 weeks       | Outpatient; ≥40 years of age; smoking history ≥10 pack-years; diagnosed with COPD; post-salbutamol FEV <sub>1</sub> /FVC ratio of <0.70 and a post-salbutamol FEV <sub>1</sub> of ≤70% | Allowed: ICS at a dose of up to 1000 mcg/day of FP or equivalent, salbutamol/albuterol as rescue<br><br>Not allowed: oral LABAs, oral and inhaled SABAs, inhaled SAMAs, ICS/SABA combinations                        |
| <b>DB2113360[7-9]<br/>(NCT01316900)</b>   | UMEC/VI 62.5/25 mcg OD<br>UMEC/VI 125/25 mcg OD<br>TIO 18 mcg OD | 24 weeks       | Outpatient; ≥40 years of age; smoking history ≥10 pack-years; diagnosed with COPD, post-salbutamol FEV <sub>1</sub> ≤70% and post-salbutamol FEV <sub>1</sub> /FVC ratio <0.7          | Allowed: ICS at a dose of up to 1000 mcg/day of FP or equivalent, salbutamol/albuterol as rescue<br><br>Not allowed: LABAs, SABAs, SAMAs, ICS/SABA combinations                                                      |
| <b>ZEP117115[10-12]<br/>(NCT01777334)</b> | UMEC/VI 62.5/25 mcg OD<br><br>TIO 18 mcg OD                      | 24 weeks       | Outpatient; ≥40 years of age; smoking history ≥10 pack-years; diagnosed with COPD; post-salbutamol FEV <sub>1</sub> /FVC ratio of <0.70 and a post-salbutamol FEV <sub>1</sub> of ≤70% | Allowed: ICS at a dose of up to 1000 mcg/day of FP or equivalent, salbutamol/albuterol as rescue<br><br>Not allowed: oral LABAs, oral and inhaled SABAs, inhaled SAMAs, ICS/LABA combinations, ICS/SABA combinations |

| Study                                              | Treatment                                                                               | Trial duration | Inclusion criteria                                                                                                                                                                                                                                   | Background treatment                                                                                                                                                                                                                                                                                                                                                                                                  |
|----------------------------------------------------|-----------------------------------------------------------------------------------------|----------------|------------------------------------------------------------------------------------------------------------------------------------------------------------------------------------------------------------------------------------------------------|-----------------------------------------------------------------------------------------------------------------------------------------------------------------------------------------------------------------------------------------------------------------------------------------------------------------------------------------------------------------------------------------------------------------------|
| <b>Aaron 2007[13, 14]</b>                          | TIO 18 mcg OD +<br>SAL 25 mcg 2 puffs BID<br><br>TIO 18 mcg OD +<br>placebo 2 puffs BID | 52 weeks       | ≥35 years of age; smoking history ≥10 pack years; diagnosis of moderate or severe COPD; ≥1 COPD exacerbation requiring systemic steroids or antibiotics in previous 12 months; post-bronchodilator FEV <sub>1</sub> ≤65%; FEV <sub>1</sub> /FVC <70% | Allowed: albuterol for relief of symptoms<br><br>Not allowed: ICS, LABA, anticholinergics                                                                                                                                                                                                                                                                                                                             |
| <b>Abrahams 2013 (NCT00528996)[15]</b>             | TIO 5 mcg OD<br><br>Placebo                                                             | 24 weeks       | ≥40 years of age; current or ex-smokers with a smoking history of >10 pack-years; COPD with a FEV <sub>1</sub> (30 min post-salbutamol/albuterol) <80% of predicted normal; FEV <sub>1</sub> /FVC ≤70%                                               | Allowed: rescue salbutamol, antibiotics, oral corticosteroids (≤10 mg daily); inhaled LABAs, oral ICS, theophylline preparations and mucolytic agents not containing bronchodilators. Short-acting anticholinergic drugs were allowed during the 2-week baseline period and the 3-week follow-up period<br><br>Not allowed: SABAs other salbutamol, anticholinergics other than the study drug and their combinations |
| <b>ACLIFORM COPD (NCT01462942; Singh 2014)[16]</b> | ACL/FOR 400/12 mcg<br>BID<br><br>Placebo                                                | 24 weeks       | ≥40 years of age; smoking history of ≥10 pack-years; FEV <sub>1</sub> <80% and ≥30% predicted; post-bronchodilator FEV <sub>1</sub> /FVC <70%                                                                                                        | Allowed: rescue use of albuterol/salbutamol; other COPD medications, such as theophylline, ICS, oral or parenteral corticosteroids (≤10 mg/day or 20 mg every other day of prednisone) were allowed if treatment was stable ≥4 weeks prior to screening.<br><br>Not allowed: LABAs other than investigational treatment                                                                                               |
| <b>ANHELTO 1 (NCT01694771; ZuWallack 2014)[17]</b> | TIO 18 mcg OD +<br>OLO 5 mcg OD<br><br>TIO 18 mcg OD                                    | 12 weeks       | ≥40 years of age; smoking history of >10 pack-years; post-bronchodilator FEV <sub>1</sub> ≥30% and <80% of predicted normal; post-bronchodilator FEV <sub>1</sub> /FVC <70% (GOLD stage 2–3)                                                         | Allowed: ICS, oral (≤10 mg prednisone per day, or equivalent) and injected steroids, cromolyn sodium/nedocromil sodium, antihistamines, antileukotrienes, methylxanthines, mucolytics,                                                                                                                                                                                                                                |



| Study                                                    | Treatment                                            | Trial duration | Inclusion criteria                                                                                                                                                                           | Background treatment                                                                                                                                                                                                                                                                                                                                                                                              |
|----------------------------------------------------------|------------------------------------------------------|----------------|----------------------------------------------------------------------------------------------------------------------------------------------------------------------------------------------|-------------------------------------------------------------------------------------------------------------------------------------------------------------------------------------------------------------------------------------------------------------------------------------------------------------------------------------------------------------------------------------------------------------------|
|                                                          |                                                      |                |                                                                                                                                                                                              | and theophyllines. Albuterol permitted as rescue medication only.<br><br>Not allowed: concurrent ICS in fixed combination with LABA; ICS/SABA combinations; SAMA/SABA combinations or phosphodiesterase type 4 inhibitors.                                                                                                                                                                                        |
| <b>ANHELTO 2</b><br>(NCT01696058;<br>ZuWallack 2014)[17] | TIO 18 mcg OD +<br>OLO 5 mcg OD<br><br>TIO 18 mcg OD | 12 weeks       | ≥40 years of age; smoking history of >10 pack-years; post-bronchodilator FEV <sub>1</sub> ≥30% and <80% of predicted normal; post-bronchodilator FEV <sub>1</sub> /FVC <70% (GOLD stage 2–3) | Allowed: ICS, oral (≤10 mg prednisone per day, or equivalent) and injected steroids, cromolyn sodium/nedocromil sodium, antihistamines, antileukotrienes, methylxanthines, mucolytics, and theophyllines. Albuterol permitted as rescue medication only.<br><br>Not allowed: concurrent ICS in fixed combination with LABA, ICS/SABA combinations, SAMA/SABA combinations or phosphodiesterase Type 4 inhibitors. |
| <b>AUGMENT COPD</b><br>(NCT01437397;<br>D'Urzo 2014)[18] | ACL/FOR 400/12 mcg<br>BID<br><br>Placebo             | 24 weeks       | ≥40 years of age; smoking history ≥10 pack-years; FEV <sub>1</sub> <80% and ≥30% predicted; post-bronchodilator FEV <sub>1</sub> /FVC <70%                                                   | Allowed: rescue use of albuterol/salbutamol; other COPD medications such as theophylline, ICS, oral or parenteral corticosteroids (≤10 mg/day or 20 mg every other day of prednisone) were allowed if treatment was stable ≥4 weeks prior to screening.<br><br>Not allowed: LABAs other than investigational treatment                                                                                            |

| Study                                                                                                 | Treatment                | Trial duration | Inclusion criteria                                                                                                                            | Background treatment                                                                                                                                                                                                                                                                                                                                                                       |
|-------------------------------------------------------------------------------------------------------|--------------------------|----------------|-----------------------------------------------------------------------------------------------------------------------------------------------|--------------------------------------------------------------------------------------------------------------------------------------------------------------------------------------------------------------------------------------------------------------------------------------------------------------------------------------------------------------------------------------------|
| <b>Bateman 2010a (NCT00387088)[19]</b>                                                                | TIO 5 mcg OD<br>Placebo  | 48 weeks       | ≥40 years of age; smoking history of ≥10 pack-years; pre-bronchodilator FEV <sub>1</sub> ≤60% of predicted normal; FEV <sub>1</sub> /FVC ≤70% | At the screening and baseline visits, and the visits at Weeks 4, 24 and 48, administration of concomitant medications before pulmonary function tests was restricted to avoid interference with the tests. The restricted period was 8 h for SABAs, 12 h for any LABA- or ICS-containing medication, and 24–48 h for xanthines, depending on the drug release kinetics of the formulation. |
| <b>Bateman 2010b (NCT00168844, BI study number 205.254; NCT00168831, BI study number 205.255)[20]</b> | TIO 5 mcg OD<br>Placebo  | 48 weeks       | ≥40 years of age; smoking history of ≥10 pack-years; pre-bronchodilator FEV <sub>1</sub> ≤60% predicted; FEV <sub>1</sub> /FVC ≤70%           | Allowed: oral and inhaled corticosteroids, theophylline preparations, mucolytic agents and antileukotrienes, if stabilized for at least 6 weeks prior to and during the study. Salbutamol MDI was used as rescue medication.<br><br>Patients on LABA and ICS were switched to ICS monotherapy prior to run-in.                                                                             |
| <b>Beeh 2006[21]</b>                                                                                  | TIO 18 mcg OD<br>Placebo | 12 weeks       | ≥40 years of age; smoking history of ≥10 pack-years; stable COPD; FEV <sub>1</sub> ≤70% predicted; FEV <sub>1</sub> /FVC <70%                 | Not allowed: LABAs and LAMAs/SAMAs other than the investigational therapy were stopped at the beginning of the study.<br><br>SABAs were uniformly replaced by fenoterol MDI for use as needed.                                                                                                                                                                                             |
| <b>BI trial number 205.269 (NCT00144326)[22]</b>                                                      | TIO 18 mcg OD<br>Placebo | 12 weeks       | ≥40 years of age; smoking history of ≥10 pack-years; FEV <sub>1</sub> <60% predicted; FEV <sub>1</sub> /FVC <70%                              | NR                                                                                                                                                                                                                                                                                                                                                                                         |

| Study                                                                 | Treatment                | Trial duration | Inclusion criteria                                                                                                                                                                                                                                     | Background treatment                                                                                                                      |
|-----------------------------------------------------------------------|--------------------------|----------------|--------------------------------------------------------------------------------------------------------------------------------------------------------------------------------------------------------------------------------------------------------|-------------------------------------------------------------------------------------------------------------------------------------------|
| <b>Brusasco 2003[23]</b>                                              | TIO 18 mcg OD<br>Placebo | 24 weeks       | >40 years of age; smoking history of >10 pack-years; FEV <sub>1</sub> ≤65% predicted; FEV <sub>1</sub> /FVC ≤70%                                                                                                                                       | NR                                                                                                                                        |
| <b>Casaburi 2000[24]</b>                                              | TIO 18 mcg OD<br>Placebo | 13 weeks       | ≥40 years of age; smoking history of >10 pack-years; diagnosis of COPD as defined by ATS; FEV <sub>1</sub> ≤65% predicted; FEV <sub>1</sub> /FVC ≤70%                                                                                                  | Allowed: stable doses of theophylline, ICS, oral prednisone<br>Not allowed: other inhaled or oral bronchodilators                         |
| <b>Casaburi 2002[25]</b>                                              | TIO 18 mcg OD<br>Placebo | 56 weeks       | ≥40 years of age; smoking history of ≥10 pack years; FEV <sub>1</sub> ≤65% predicted; FEV <sub>1</sub> /FVC ≤70%                                                                                                                                       | Allowed: stable doses of theophylline, ICS, oral prednisone                                                                               |
| <b>Chan 2007 (Boehringer Ingelheim [BI] trial number 205.259)[26]</b> | TIO 18 mcg OD<br>Placebo | 48 weeks       | ≥40 years of age; smoking history of ≥10 pack-years; FEV <sub>1</sub> ≤65% predicted; FEV <sub>1</sub> /FVC ≤70%; ≥1 exacerbation in the previous year excluding the 6 weeks prior to start (later amended to ≥1 exacerbation in the previous 2 years) | Allowed: stable dose oral corticosteroids, ICS, theophylline preparations, mucolytic preparations (not containing bronchodilators), LABAs |
| <b>Covelli 2005[27]</b>                                               | TIO 18 mcg OD<br>Placebo | 12 weeks       | FEV <sub>1</sub> ≤60% predicted; FEV <sub>1</sub> /FVC ≤70%. Patients were excluded if they experienced an exacerbation within 6 weeks prior to start                                                                                                  | Allowed: ICS, LABAs and theophyllines<br>Not allowed: cromones, leukotriene antagonists, inhaled anticholinergics                         |
| <b>Donohue 2002[28]</b>                                               | TIO 18 mcg OD<br>Placebo | 24 weeks       | ≥40 years of age; smoking history of >10 pack-years; FEV <sub>1</sub> ≤60% predicted; FEV <sub>1</sub> /FVC ≤70%                                                                                                                                       | Allowed: usual ICS and oral steroids<br>Not allowed: inhaled anticholinergic LABAs                                                        |

| Study                                            | Treatment                            | Trial duration | Inclusion criteria                                                                                                                                                                                                                                         | Background treatment                                                                                                                                                                                                                                                                                                                                                                            |
|--------------------------------------------------|--------------------------------------|----------------|------------------------------------------------------------------------------------------------------------------------------------------------------------------------------------------------------------------------------------------------------------|-------------------------------------------------------------------------------------------------------------------------------------------------------------------------------------------------------------------------------------------------------------------------------------------------------------------------------------------------------------------------------------------------|
| <b>Donohue 2010[29]</b>                          | TIO 18 mcg OD<br>Placebo             | 26 weeks       | ≥40 years of age; smoking history of ≥20 pack-years; diagnosis of moderate-to-severe COPD (GOLD criteria); post-bronchodilator (within 30 min of inhaling albuterol 360 mcg) FEV <sub>1</sub> <80% and ≥30% predicted; FEV <sub>1</sub> /FVC <70%          | Allowed: albuterol as needed; continued ICS monotherapy if stable for 1 month before screening (dose and regimen were to remain stable throughout the study)<br><br>Not allowed: LAMAs or LABAs other than the investigational therapy (discontinued prior to start with appropriate washout); patients receiving ICS/LABA combinations were switched to ICS monotherapy at an equivalent dose. |
| <b>ENLIGHTEN (Dahl 2013, NCT01120717)[30-32]</b> | GLY/IND 110/50 mcg OD<br>Placebo     | 52 weeks       | ≥40 years of age; smoking history of ≥10 pack years; diagnosis of moderate or severe COPD (stage II or III according to GOLD 2008 criteria); post-bronchodilator FEV <sub>1</sub> <80% and ≥30% predicted; post-bronchodilator FEV <sub>1</sub> /FVC <0.70 | Allowed: Albuterol as rescue medication, ICS monotherapy<br><br>Not allowed: long-acting bronchodilators (LABA, LAMA, theophylline), SAMAs                                                                                                                                                                                                                                                      |
| <b>FLIGHT1 (NCT01727141; Mahler 2015)[33]</b>    | GLY/IND 27.5/15.6 mcg BID<br>Placebo | 12 weeks       | ≥40 years of age; smoking history of ≥10 pack years; stable COPD according to GOLD 2011 guidelines; post-bronchodilator FEV <sub>1</sub> ≥30% and <80% predicted; post-bronchodilator FEV <sub>1</sub> /FVC <0.70 at run-in; mMRC grade ≥2 at run-in       | Allowed: background ICS<br><br>Not allowed: COPD-related medications other than investigational therapy (LAMAs, SAMAs, ICS/LABA combinations, SABA, SAMA/SABA combinations, etc.)<br><br>Patients receiving SSRIs, ICS, intranasal steroids, H <sub>1</sub> -antagonists, or inactivated influenza, pneumococcal or any other inactivated vaccines should be excluded unless on stable dose.    |
| <b>FLIGHT2 (NCT01712516; Mahler 2015)[33]</b>    | GLY/IND 27.5/15.6 mcg BID<br>Placebo | 12 weeks       | ≥40 years of age; smoking history of ≥10 pack years; stable COPD according to GOLD 2011 guidelines; post-bronchodilator FEV <sub>1</sub> ≥30% and                                                                                                          | Allowed: background ICS<br><br>Not allowed: COPD-related medications other than investigational therapy (LAMAs, SAMAs,                                                                                                                                                                                                                                                                          |

| Study                                                           | Treatment                                              | Trial duration | Inclusion criteria                                                                                                                                                                                              | Background treatment                                                                                                                                                                                                                                                 |
|-----------------------------------------------------------------|--------------------------------------------------------|----------------|-----------------------------------------------------------------------------------------------------------------------------------------------------------------------------------------------------------------|----------------------------------------------------------------------------------------------------------------------------------------------------------------------------------------------------------------------------------------------------------------------|
|                                                                 |                                                        |                | <80% predicted; post-bronchodilator FEV <sub>1</sub> /FVC <0.70 at run-in; mMRC grade ≥2 at run-in                                                                                                              | ICS/LABA combinations, SABA, SAMA/SABA combinations, etc.)<br><br>Patients receiving SSRIs, ICS, intranasal steroids, H <sub>1</sub> -antagonists, or inactivated influenza, pneumococcal or any other inactivated vaccine should be excluded unless on stable dose. |
| <b>GLOW2<br/>(Kerwin 2012,<br/>NCT00929110)[34]</b>             | TIO 18 mcg OD<br><br>Placebo                           | 52 weeks       | ≥40 years of age; smoking history of ≥10 pack-years; diagnosis of moderate-to-severe stable COPD; post-bronchodilator FEV <sub>1</sub> ≥30% and <80% predicted; post-bronchodilator FEV <sub>1</sub> /FVC <0.70 | Allowed: inhaled or intranasal corticosteroids and H <sub>1</sub> -antagonists; rescue salbutamol/albuterol<br><br>Not allowed: LAMAs (min 7 days before run-in); LABAs or ICS/LABA combinations (min 48 h before run-in).                                           |
| <b>INTRUST-1<br/>(Mahler 2012,<br/>NCT00846586)[35-37]</b>      | TIO 18 mcg OD +<br>IND 150 mcg OD<br><br>TIO 18 mcg OD | 12 weeks       | ≥40 years of age; smoking history of ≥10 pack-years; post-bronchodilator FEV <sub>1</sub> ≤65% and ≥30% predicted; post-bronchodilator FEV <sub>1</sub> /FVC <70%                                               | Allowed: ICS monotherapy, rescue salbutamol/albuterol<br><br>Not allowed: LABAs, SABAs other than the investigational therapy, theophylline, anticholinergics                                                                                                        |
| <b>INTRUST-2<br/>(Mahler 2012,<br/>NCT00877383)[35, 38, 39]</b> | TIO 18 mcg OD +<br>IND 150 mcg OD<br><br>TIO 18 mcg OD | 12 weeks       | ≥40 years of age; smoking history of ≥10 pack-years; post-bronchodilator FEV <sub>1</sub> ≤65% and ≥30% predicted; post-bronchodilator FEV <sub>1</sub> /FVC <70%                                               | Allowed: ICS monotherapy, rescue salbutamol/albuterol<br><br>Not allowed: LABAs, SABAs other than the investigational therapy, theophylline, anticholinergics                                                                                                        |

| Study                                         | Treatment                                     | Trial duration | Inclusion criteria                                                                                                                                                                                   | Background treatment                                                                                                                                                                                                                                         |
|-----------------------------------------------|-----------------------------------------------|----------------|------------------------------------------------------------------------------------------------------------------------------------------------------------------------------------------------------|--------------------------------------------------------------------------------------------------------------------------------------------------------------------------------------------------------------------------------------------------------------|
| <b>Moita 2008[40]</b>                         | TIO 18 mcg OD<br>Placebo                      | 12 weeks       | FEV <sub>1</sub> ≤70% predicted; FEV <sub>1</sub> /FVC ≤70%. Patients with ≥3 exacerbations in the previous year or an exacerbation within 6 weeks prior to start were excluded.                     | Allowed: LABAs, theophylline, mucolytics, ICS, stable doses oral corticosteroids; temporary increases in theophylline or oral steroids for exacerbations.<br><br>Not allowed: theophylline 24 h preparation                                                  |
| <b>Niewoehner 2005[41]</b>                    | TIO 18 mcg OD<br>Placebo                      | 6 months       | ≥40 years of age; smoking history of ≥10 pack-years; FEV <sub>1</sub> ≤60% predicted; FEV <sub>1</sub> /FVC ≤70%. Patients were excluded if not recovered from exacerbation ≥30 days prior to start. | Allowed: all other respiratory medications (including ICS and LABAs)<br><br>Not allowed: open-label anticholinergic bronchodilator                                                                                                                           |
| <b>OTEMTO 1 (NCT01964352; Singh 2015)[42]</b> | TIO/OLO 5/5 mcg OD<br>TIO 5 mcg OD<br>Placebo | 12 weeks       | ≥40 years of age; smoking history of >10 pack-years; moderate-to-severe COPD (GOLD stage 2–3); post-bronchodilator FEV <sub>1</sub> ≥30% and <80% predicted; FEV <sub>1</sub> /FVC <70% predicted    | Allowed: open-label rescue salbutamol; continued ICS therapy if patients were on a stable dose for 6 weeks prior to screening.<br><br>Not allowed: LAMAs or LABAs other than study medication.<br><br>SAMAs were permitted only during the screening period. |
| <b>OTEMTO 2 (NCT02006732; Singh 2015)[42]</b> | TIO/OLO 5/5 mcg OD<br>TIO 5 mcg OD<br>Placebo | 12 weeks       | ≥40 years of age; smoking history of >10 pack-years; moderate-to-severe COPD (GOLD stage 2–3); post-bronchodilator FEV <sub>1</sub> ≥30% and <80% predicted; FEV <sub>1</sub> /FVC <70% predicted    | Allowed: open-label rescue salbutamol; continued ICS therapy if patients were on a stable dose for 6 weeks prior to screening.<br><br>Not allowed: LAMAs or LABAs other than study medication.<br><br>SAMAs were permitted only during the screening period. |

| Study                                                    | Treatment                                                         | Trial duration | Inclusion criteria                                                                                                                                                                                                                                                                                                            | Background treatment                                                                                                                                                                                                                                                                                                                |
|----------------------------------------------------------|-------------------------------------------------------------------|----------------|-------------------------------------------------------------------------------------------------------------------------------------------------------------------------------------------------------------------------------------------------------------------------------------------------------------------------------|-------------------------------------------------------------------------------------------------------------------------------------------------------------------------------------------------------------------------------------------------------------------------------------------------------------------------------------|
| <b>QUANTIFY<br/>(NCT01574651;<br/>Buhl 2015)[43]</b>     | GLY/IND 110/50 mcg OD<br><br>TIO 18 mcg OD + FOR 12 mcg BID       | 26 weeks       | ≥40 years of age; smoking history of ≥10 pack-years; moderate-to-severe stable COPD (GOLD stage 2–3); post-bronchodilator FEV <sub>1</sub> ≥30% and <80% predicted; post-bronchodilator FEV <sub>1</sub> /FVC <0.7                                                                                                            | Allowed: rescue salbutamol; SSRIs; H <sub>1</sub> -antagonists (except mizolastine or terfenadine), inactivated influenza, pneumococcal or any other inactivated vaccine if not administered within 48 h before the study visit. Patients receiving ICS at baseline continued treatment at the same or equivalent dose and regimen. |
| <b>SHINE<br/>(Bateman 2013,<br/>NCT01202188)[44-46]</b>  | GLY/IND 110/50 mcg OD<br><br>TIO 18 mcg OD<br><br>Placebo         | 26 weeks       | ≥40 years of age; smoking history of ≥10 pack-years; diagnosis of moderate or severe COPD (stage II or III according to GOLD 2008 criteria); post-bronchodilator FEV <sub>1</sub> <80% and ≥30% predicted; post-bronchodilator FEV <sub>1</sub> /FVC <0.70                                                                    | Allowed: salbutamol/albuterol as rescue medication, inhaled or intranasal corticosteroids in constant doses<br><br>Not allowed: LABA, LAMA, LABA/ICS combinations                                                                                                                                                                   |
| <b>SPARK<br/>(Wedzicha 2013,<br/>NCT01120691)[47-49]</b> | GLY/IND 110/50 mcg OD<br><br>TIO 18 mcg OD                        | 64 weeks       | ≥40 years of age; smoking history of ≥10 pack-years; diagnosis of severe or very severe COPD (stage III or IV according to GOLD 2008 criteria); post-bronchodilator FEV <sub>1</sub> <50% predicted; FEV <sub>1</sub> /FVC <0.70; ≥1 exacerbation in the previous 12 months requiring systemic corticosteroids or antibiotics | Allowed: salbutamol, stable ICS doses<br><br>Not allowed: long-acting bronchodilators other than investigational therapies                                                                                                                                                                                                          |
| <b>Tashkin 2009[50]</b>                                  | TIO 18 mcg OD + FOR 12 mcg BID<br><br>TIO 18 mcg OD + Placebo BID | 12 weeks       | ≥40 years of age; post-bronchodilator FEV <sub>1</sub> <70% and >30% predicted or >0.75 L, whichever was lower, at run-in; FEV <sub>1</sub> /FVC <0.70                                                                                                                                                                        | Allowed: rescue albuterol; continued use of prior stable ICS regimens and systemic corticosteroids for treatment of exacerbations                                                                                                                                                                                                   |

| Study                                                                      | Treatment                          | Trial duration | Inclusion criteria                                                                                                                                                                                                  | Background treatment                                                                                                                                                                                                                                                                                                                                                    |
|----------------------------------------------------------------------------|------------------------------------|----------------|---------------------------------------------------------------------------------------------------------------------------------------------------------------------------------------------------------------------|-------------------------------------------------------------------------------------------------------------------------------------------------------------------------------------------------------------------------------------------------------------------------------------------------------------------------------------------------------------------------|
| <b>TIOSPIR</b><br>(NCT01126437;<br>Wise 2013;<br>Anzueto 2015)<br>[51, 52] | TIO 18 mcg OD<br>TIO 5 mcg OD      | 2.3 years      | ≥40 years of age; smoking history of ≥10 pack-years; diagnosis of COPD with a post-bronchodilator FEV <sub>1</sub> ≤70% predicted and post-bronchodilator FEV <sub>1</sub> /FVC ≤70%                                | Allowed: all COPD medications except other inhaled anticholinergic agents                                                                                                                                                                                                                                                                                               |
| <b>TIPHON</b><br>(Tonnel 2008,<br>NCT00274053)[53]                         | TIO 18 mcg OD<br>Placebo           | 36 weeks       | ≥40 years of age; smoking history of >10 pack-years; FEV <sub>1</sub> 20-70% predicted; FEV <sub>1</sub> /SVC ≤70%                                                                                                  | Allowed: stable doses of theophylline preparations (excluding 24-h preparations), mucolytics, ICS and oral steroids                                                                                                                                                                                                                                                     |
| <b>TONADO-1</b><br>(NCT01431274; Buhl 2015; Ferguson 2015)<br>[54, 55]     | TIO/OLO 5/5 mcg OD<br>TIO 5 mcg OD | 52 weeks       | Outpatient; ≥40 years of age; smoking history of >10 pack-years; moderate-to-very-severe COPD (GOLD stage 2–4); post-bronchodilator FEV <sub>1</sub> <80% predicted; post-bronchodilator FEV <sub>1</sub> /FVC <70% | Allowed: background ICS                                                                                                                                                                                                                                                                                                                                                 |
| <b>TONADO-2</b><br>(NCT01431287; Buhl 2015; Ferguson 2015)[54, 55]         | TIO/OLO 5/5 mcg OD<br>TIO 5 mcg OD | 52 weeks       | Outpatient; ≥40 years of age; smoking history of >10 pack-years; moderate-to-very-severe COPD (GOLD stage 2–4); post-bronchodilator FEV <sub>1</sub> <80% predicted; post-bronchodilator FEV <sub>1</sub> /FVC <70% | Allowed: background ICS                                                                                                                                                                                                                                                                                                                                                 |
| <b>Troosters 2014</b><br>(NCT00523991)[56]                                 | TIO 18 mcg OD<br>Placebo           | 24 weeks       | ≥40 and ≤80 years of age; smoking history of ≥10 pack-years; diagnosis of COPD (GOLD stage 2): post-bronchodilator FEV <sub>1</sub> /FVC <0.7; FEV <sub>1</sub> ≥50% and <80% predicted; MRC dyspnea score ≥2       | Allowed: open-label rescue salbutamol as needed; oral corticosteroid treatment for ≤2 weeks for acute exacerbations<br><br>Not allowed (during the 6 months before and throughout the study): LABAs; SABAs (except salbutamol after visit 1); oral β <sub>2</sub> -agonists; ICS; ICS/LABA; oral corticosteroids; theophylline; leukotriene antagonists; all open-label |



| Study                                                                                                | Treatment                                                  | Trial duration | Inclusion criteria                                                                                                                                                                                                         | Background treatment                                                                                                                                                                                                                                     |
|------------------------------------------------------------------------------------------------------|------------------------------------------------------------|----------------|----------------------------------------------------------------------------------------------------------------------------------------------------------------------------------------------------------------------------|----------------------------------------------------------------------------------------------------------------------------------------------------------------------------------------------------------------------------------------------------------|
|                                                                                                      |                                                            |                |                                                                                                                                                                                                                            | anticholinergics (including ipratropium, TIO, combinations of these and oxitropium)                                                                                                                                                                      |
| <b>UPLIFT (Tashkin 2008, 2012 and 2014; Celli 2009; Buhl 2012)[57-61]</b>                            | TIO 18 mcg OD<br>Placebo                                   | 4 years        | ≥40 years of age; smoking history of >10 pack-years; FEV <sub>1</sub> ≤70% predicted; FEV <sub>1</sub> /FVC ≤70%. Patients with exacerbations within 4 weeks prior to start were excluded.                                 | Allowed: all respiratory medications except other inhaled anticholinergics                                                                                                                                                                               |
| <b>Verkindre 2006[62]</b>                                                                            | TIO 18 mcg OD<br>Placebo                                   | 12 weeks       | FEV <sub>1</sub> ≤50% predicted; FEV <sub>1</sub> /SVC ≤70%; residual volume ≥125%. Patients on unstable doses of oral corticosteroids within 6 weeks prior to start were excluded.                                        | Allowed: stable doses of oral corticosteroids, ICS, theophylline preparations, mucolytic agents<br>Not allowed: SABAs, oral β <sub>2</sub> -agonists, LABAs                                                                                              |
| <b>Vogelmeier 2008 (NCT00134979)[63]</b>                                                             | TIO 18 mcg OD + FOR 10 mcg BID<br>TIO 18 mcg OD<br>Placebo | 24 weeks       | ≥40 years of age at onset of COPD; smoking history of ≥10 pack-years; FEV <sub>1</sub> <70% predicted and ≥1.00 L; FEV <sub>1</sub> /FVC <70%                                                                              | Allowed: salbutamol, ICS monotherapy                                                                                                                                                                                                                     |
| <b>Voshaar 2008 (NCT00239473, BI study number 205.251; NCT00240435, BI study number 205.252)[64]</b> | TIO 5 mcg OD<br>Placebo                                    | 12 weeks       | ≥40 years of age; smoking history of ≥10 pack-years; diagnosis of COPD; moderate-to-severe airway obstruction with a pre-bronchodilator FEV <sub>1</sub> ≤60% predicted; FEV <sub>1</sub> /FVC ≤70% (based on ECCS values) | Allowed: rescue salbutamol pressurized MDI as needed; oral corticosteroids (equivalent of <10 mg prednisone per day), orally inhaled corticosteroids, theophyllines and mucolytics if stabilized for at least 6 weeks prior to and throughout the study. |

| Study | Treatment | Trial duration | Inclusion criteria | Background treatment                                                                                                                                                                                                                                                                     |
|-------|-----------|----------------|--------------------|------------------------------------------------------------------------------------------------------------------------------------------------------------------------------------------------------------------------------------------------------------------------------------------|
|       |           |                |                    | Not allowed: oral $\beta$ -adrenergics and other investigational drugs (at least 1 month prior to run-in); cromolyn sodium and nedocromil sodium (at least 3 months prior to run-in); anticholinergics; inhaled $\beta$ -adrenergics other than salbutamol or fixed combination inhalers |

ACL, acclidinium; ATS, American Thoracic Society; BID, twice daily; COPD, chronic obstructive pulmonary disease; ECCS, European Community of Coal and Steel; FEV<sub>1</sub>, forced expiratory volume in 1 second; FOR, formoterol; FP, fluticasone propionate; FVC, forced vital capacity; GLY, glycopyrronium; GOLD, Global Initiative for Chronic Obstructive Lung Disease; ICS, inhaled corticosteroid; IND, indacaterol; LABA, long-acting  $\beta_2$ -agonist; LAMA, long-acting muscarinic antagonist; MDI, metered dose inhaler; (m)MRC, (modified) Medical Research Council; NMA, network meta-analysis; NR, not reported; OD, once daily; OLO, olodaterol; SABA, short-acting  $\beta_2$ -agonist; SAL, salmeterol; SAMA, short-acting muscarinic antagonist; SSRI, selective serotonin reuptake inhibitor; SVC, slow vital capacity; TIO, tiotropium; UMEC, umeclidinium; VI, vilanterol.

**Supplementary Table S4: Risk of bias assessment for included studies**

| Study                                    | Adequate generation of randomization sequence | Adequate allocation concealment | Blinding |            | Result independent reporting of all relevant endpoints | Other aspects that increase the risk of bias | Overall rating of study specific risk of bias |
|------------------------------------------|-----------------------------------------------|---------------------------------|----------|------------|--------------------------------------------------------|----------------------------------------------|-----------------------------------------------|
|                                          |                                               |                                 | Patients | Caregivers |                                                        |                                              |                                               |
| DB2113373                                | Yes                                           | Yes                             | Yes      | Yes        | Yes                                                    | No                                           | Low                                           |
| DB2113374                                | Yes                                           | Yes                             | Yes      | Yes        | Yes                                                    | No                                           | Low                                           |
| DB2113360                                | Yes                                           | Yes                             | Yes      | Yes        | Yes                                                    | No                                           | Low                                           |
| ZEP117115                                | Yes                                           | Yes                             | Yes      | Yes        | Yes                                                    | No                                           | Low                                           |
| Aaron 2007                               | Yes                                           | Yes                             | Yes      | Yes        | Yes                                                    | No                                           | Low                                           |
| Abrahams 2013 (NCT00528996)              | Unclear                                       | Unclear                         | Yes      | Yes        | Yes                                                    | No                                           | Low                                           |
| ACLIFORM COPD (Singh 2014)               | Yes                                           | Yes                             | Yes      | Yes        | Yes                                                    | No                                           | Low                                           |
| ANHELTO 1 (NCT01694771; ZuWallack 2014)  | Unclear                                       | Unclear                         | Yes      | Yes        | Yes                                                    | No                                           | Low                                           |
| ANHELTO 2 (NCT01696058; ZuWallack 2014)  | Unclear                                       | Unclear                         | Yes      | Yes        | Yes                                                    | No                                           | Low                                           |
| AUGMENT COPD (NCT01437397; D'Urzo 2014)  | Unclear                                       | Unclear                         | Yes      | Yes        | Yes                                                    | No                                           | Low                                           |
| Bateman 2010a (NCT00387088)              | Yes                                           | Yes                             | Yes      | Yes        | Yes                                                    | No                                           | Low                                           |
| Bateman 2010b (NCT00168844; NCT00168831) | Unclear                                       | Unclear                         | Yes      | Yes        | Yes                                                    | No                                           | Low                                           |
| Beeh 2006                                | Unclear                                       | Unclear                         | Yes      | Yes        | Yes                                                    | No                                           | Low                                           |
| BI trial 205.269 (NCT00144326)           | Unclear                                       | Unclear                         | Yes      | Yes        | Yes                                                    | No                                           | Low                                           |
| Brusasco 2003                            | Unclear                                       | Unclear                         | Yes      | Yes        | Yes                                                    | No                                           | Low                                           |

| Study                                   | Adequate generation of randomization sequence | Adequate allocation concealment | Blinding |            | Result independent reporting of all relevant endpoints | Other aspects that increase the risk of bias | Overall rating of study specific risk of bias |
|-----------------------------------------|-----------------------------------------------|---------------------------------|----------|------------|--------------------------------------------------------|----------------------------------------------|-----------------------------------------------|
|                                         |                                               |                                 | Patients | Caregivers |                                                        |                                              |                                               |
| Casaburi 2000                           | Unclear                                       | Unclear                         | Yes      | Yes        | Yes                                                    | No                                           | Low                                           |
| Casaburi 2002                           | Unclear                                       | Unclear                         | Yes      | Yes        | Yes                                                    | No                                           | Low                                           |
| Chan 2007<br>(BI trial: 205.259)        | Unclear                                       | Unclear                         | Yes      | Yes        | Yes                                                    | No                                           | Low                                           |
| Covelli 2005                            | Unclear                                       | Unclear                         | Yes      | Yes        | Yes                                                    | No                                           | Low                                           |
| Donohue 2002                            | Unclear                                       | Unclear                         | Yes      | Yes        | Yes                                                    | No                                           | Low                                           |
| Donohue 2010                            | Unclear                                       | Unclear                         | No       | No         | Yes                                                    | No                                           | High                                          |
| ENLIGHTEN (Dahl 2013)                   | Unclear                                       | Unclear                         | Yes      | Yes        | Yes                                                    | Yes                                          | Low                                           |
| FLIGHT1 (NCT01727141;<br>Mahler 2015)   | Yes                                           | Yes                             | Yes      | Yes        | Yes                                                    | No                                           | Low                                           |
| FLIGHT2 (NCT01712516;<br>Mahler 2015)   | Yes                                           | Yes                             | Yes      | Yes        | Yes                                                    | No                                           | Low                                           |
| GLOW2 (Kerwin 2012)                     | Unclear                                       | Unclear                         | Yes      | Yes        | Yes                                                    | No                                           | Low                                           |
| INTRUST-1<br>(Mahler 2012)              | Yes                                           | Yes                             | Yes      | Yes        | Yes                                                    | No                                           | Low                                           |
| INTRUST-2<br>(Mahler 2012)              | Yes                                           | Yes                             | Yes      | Yes        | Yes                                                    | No                                           | Low                                           |
| Moita 2008                              | Unclear                                       | Unclear                         | Yes      | Yes        | Yes                                                    | No                                           | Low                                           |
| Niewoehner 2005                         | Yes                                           | Yes                             | Yes      | Yes        | Yes                                                    | No                                           | Low                                           |
| OTEMTO 1 (Singh 2015)                   | Unclear                                       | Unclear                         | Yes      | Yes        | Yes                                                    | No                                           | Low                                           |
| OTEMTO 2 (Singh 2015)                   | Unclear                                       | Unclear                         | Yes      | Yes        | Yes                                                    | No                                           | Low                                           |
| QUANTIFY<br>(NCT01120717;<br>Buhl 2015) | Yes                                           | Yes                             | Yes      | Yes        | Yes                                                    | No                                           | Low                                           |
| SHINE (Bateman 2013)                    | Yes                                           | No                              | No       | No         | Yes                                                    | No                                           | High                                          |
| SPARK (Wedzicha 2013)                   | Yes                                           | No                              | No       | No         | No                                                     | No                                           | High                                          |
| Tashkin 2009                            | Yes                                           | Yes                             | Yes      | Yes        | Yes                                                    | No                                           | Low                                           |

| Study                                                                                     | Adequate generation of randomization sequence | Adequate allocation concealment | Blinding |            | Result independent reporting of all relevant endpoints | Other aspects that increase the risk of bias | Overall rating of study specific risk of bias |
|-------------------------------------------------------------------------------------------|-----------------------------------------------|---------------------------------|----------|------------|--------------------------------------------------------|----------------------------------------------|-----------------------------------------------|
|                                                                                           |                                               |                                 | Patients | Caregivers |                                                        |                                              |                                               |
| TIOSPIR (NCT01126437; Wise 2013; Anzueto 2015)                                            | Yes                                           | Yes                             | Yes      | Yes        | Yes                                                    | No                                           | Low                                           |
| TIPHON (Tonnel 2008)                                                                      | Yes                                           | Yes                             | Yes      | Yes        | Yes                                                    | No                                           | Low                                           |
| TONADO-1 (NCT01431274; Buhl 2015; Ferguson 2015)                                          | Yes                                           | Yes                             | Yes      | Yes        | Yes                                                    | No                                           | Low                                           |
| TONADO-2 (NCT01431287; Buhl 2015; Ferguson 2015)                                          | Yes                                           | Yes                             | Yes      | Yes        | Yes                                                    | No                                           | Low                                           |
| Troosters 2014 (NCT00523991)                                                              | Unclear                                       | Unclear                         | Yes      | Yes        | Yes                                                    | No                                           | Low                                           |
| UPLIFT (Tashkin 2008, 2012 and 2014; Celli 2009; Buhl 2012)                               | Yes                                           | Yes                             | Yes      | Yes        | Yes                                                    | No                                           | Low                                           |
| Verkindre 2006                                                                            | Unclear                                       | Unclear                         | Yes      | Yes        | Yes                                                    | No                                           | Low                                           |
| Vogelmeier 2008 (NCT00134979)                                                             | Unclear                                       | No                              | No       | No         | Yes                                                    | No                                           | High                                          |
| Voshaar 2008 (NCT00239473, BI study number 205.251; NCT00240435, BI study number 205.252) | Unclear                                       | Unclear                         | Yes      | Yes        | Yes                                                    | No                                           | Low                                           |

**Supplementary Table S5: Individual study results at 12 and 24 weeks for trough FEV<sub>1</sub>, SGRQ total scores, TDI focal scores, and rescue medication use (puffs/day)**

| Study     | Treatment                    | Weeks | Trough FEV <sub>1</sub> in mL<br>(difference in CFB),<br>mean (SE) | SGRQ total score<br>(difference in CFB),<br>mean (SE) | TDI focal score<br>(difference in TDI),<br>mean (SE) | Rescue medication use<br>(difference in puffs/day),<br>mean (SE) |
|-----------|------------------------------|-------|--------------------------------------------------------------------|-------------------------------------------------------|------------------------------------------------------|------------------------------------------------------------------|
| DB2113373 | UMEC/VI 62.5/25 vs<br>PBO    | 12    | 195.00 (17.86)                                                     | -4.72 (1.06)                                          | 1.30 (0.23)                                          | -1.00 (0.24)                                                     |
|           |                              | 24    | 167.00 (20.15)                                                     | -5.51 (1.21)                                          | 1.20 (0.26)                                          | -0.80 (0.26)                                                     |
| DB2113374 | UMEC/VI 62.5/25 vs<br>TIO 18 | 12    | 95.00 (21.94)                                                      | -2.01 (1.26)                                          | 0.70 (0.31)                                          | -0.51 (0.32)                                                     |
|           |                              | 24    | 60.00 (25.26)                                                      | -0.17 (1.37)                                          | 0.20 (0.36)                                          | -0.60 (0.31)                                                     |
| DB2113360 | UMEC/VI 62.5/25 vs<br>TIO 18 | 12    | 80.00 (24.49)                                                      | -0.23 (1.29)                                          | 0.20 (0.26)                                          | -0.78 (0.30)                                                     |
|           |                              | 24    | 90.00 (26.02)                                                      | 0.75 (1.47)                                           | -0.10 (0.31)                                         | -0.70 (0.28)                                                     |
| ZEP117115 | UMEC/VI 62.5/25 vs<br>TIO 18 | 12    | 109.00 (15.82)                                                     | -2.08 (0.70)                                          |                                                      | -0.50 (0.10)                                                     |
|           |                              | 24    | 112.00 (16.07)                                                     | -2.10 (0.77)                                          |                                                      | -0.50 (0.13)                                                     |
| ACLIFORM  | ACL/FOR 400/12 vs<br>PBO     | 12    | 127.10 (17.38 <sup>a</sup> )                                       |                                                       |                                                      |                                                                  |
|           |                              | 24    | 143.00 (12.00)                                                     | -0.65 (1.24)                                          | 1.29 (0.29)                                          | -0.66 (0.20 <sup>a</sup> )                                       |
| AUGMENT   | ACL/FOR 400/12 vs<br>PBO     | 12    | 146.00 (18.55 <sup>a</sup> )                                       |                                                       |                                                      |                                                                  |
|           |                              | 24    | 129.00 (17.54)                                                     | -4.36 (1.05)                                          | 1.44 (0.27 <sup>a</sup> )                            |                                                                  |
| OTEMTO 1  | TIO/OLO 5/5 vs PBO           | 12    | 162.00 (19.00)                                                     | -4.89 (1.02)                                          | 2.05 (0.27)                                          |                                                                  |
|           |                              | 24    |                                                                    |                                                       |                                                      |                                                                  |
| OTEMTO 2  | TIO/OLO 5/5 vs PBO           | 12    | 166.00 (19.00)                                                     | -4.56 (0.99)                                          | 1.20 (0.27)                                          |                                                                  |
|           |                              | 24    |                                                                    |                                                       |                                                      |                                                                  |

| <b>Study</b> | <b>Treatment</b>              | <b>Weeks</b> | <b>Trough FEV<sub>1</sub> in mL<br/>(difference in CFB),<br/>mean (SE)</b> | <b>SGRQ total score<br/>(difference in CFB),<br/>mean (SE)</b> | <b>TDI focal score<br/>(difference in TDI),<br/>mean (SE)</b> | <b>Rescue medication use<br/>(difference in puffs/day),<br/>mean (SE)</b> |
|--------------|-------------------------------|--------------|----------------------------------------------------------------------------|----------------------------------------------------------------|---------------------------------------------------------------|---------------------------------------------------------------------------|
| TONADO-1     | TIO/OLO 5/5 vs TIO 5          | 12           | 75.60 (14.92 <sup>a</sup> )                                                |                                                                |                                                               | -0.68 (0.11 <sup>a</sup> ) <sup>b</sup>                                   |
|              |                               | 24           | 71.00 (12.00)                                                              | -1.23 (0.55) <sup>b</sup>                                      | 0.36 (0.14) <sup>b</sup>                                      | -0.63 (0.12 <sup>a</sup> ) <sup>b</sup>                                   |
| TONADO-2     | TIO/OLO 5/5 vs TIO 5          | 12           | 59.30 (15.14 <sup>a</sup> )                                                |                                                                |                                                               |                                                                           |
|              |                               | 24           | 50.00 (13.00)                                                              |                                                                |                                                               |                                                                           |
| ANHELTO 1    | OLO 5 + TIO 18                | 12           | 62.00 (13.00)                                                              | -1.85 (0.46) <sup>c</sup>                                      |                                                               |                                                                           |
|              |                               | 24           |                                                                            |                                                                |                                                               |                                                                           |
| ANHELTO 2    | OLO 5 + TIO 18                | 12           | 40.00 (13.00)                                                              |                                                                |                                                               |                                                                           |
|              |                               | 24           |                                                                            |                                                                |                                                               |                                                                           |
| INTRUST-1    | IND 150 + TIO 18 vs<br>TIO 18 | 12           | 80.00 (12.76)                                                              |                                                                |                                                               | -1.10 (0.18)                                                              |
|              |                               | 24           |                                                                            |                                                                |                                                               |                                                                           |
| INTRUST-2    | IND 150 + TIO 18 vs<br>TIO 18 | 12           | 70.00 (10.20)                                                              |                                                                |                                                               | -0.70 (0.15)                                                              |
|              |                               | 24           |                                                                            |                                                                |                                                               |                                                                           |
| Aaron 2007   | TIO 18 + SAL 50 vs TIO<br>18  | 12           |                                                                            |                                                                |                                                               |                                                                           |
|              |                               | 24           | 18.49 (45.46)                                                              | -1.47 (0.69)                                                   | -0.42 (0.43)                                                  |                                                                           |
| FLIGHT-1     | GLY/IND 27.5/15.6 vs<br>PBO   | 12           | 213.00 (20.66)                                                             | -3.80 (0.99)                                                   | 1.23 (0.25)                                                   | -1.22 (0.18)                                                              |
|              |                               | 24           |                                                                            |                                                                |                                                               |                                                                           |
| FLIGHT-2     | GLY/IND 27.5/15.6 vs<br>PBO   | 12           | 233.00 (20.66)                                                             | -6.40 (1.10)                                                   | 2.03 (0.26)                                                   | -1.16 (0.19)                                                              |
|              |                               | 24           |                                                                            |                                                                |                                                               |                                                                           |

| Study              | Treatment                            | Weeks | Trough FEV <sub>1</sub> in mL<br>(difference in CFB),<br>mean (SE) | SGRQ total score<br>(difference in CFB),<br>mean (SE) | TDI focal score<br>(difference in TDI),<br>mean (SE) | Rescue medication use<br>(difference in puffs/day),<br>mean (SE) |
|--------------------|--------------------------------------|-------|--------------------------------------------------------------------|-------------------------------------------------------|------------------------------------------------------|------------------------------------------------------------------|
| ENLIGHTEN          | GLY/IND 110/50<br>vs PBO             | 12    | 163.00 (32.02)                                                     |                                                       |                                                      |                                                                  |
|                    |                                      | 24    | 152.00 (35.36)                                                     |                                                       |                                                      |                                                                  |
| QUANTIFY           | GLY/IND 110/50<br>vs TIO 18 + FOR 12 | 12    | 72.00 (16.33)                                                      |                                                       |                                                      |                                                                  |
|                    |                                      | 24    | 68.00 (16.07)                                                      |                                                       | 0.38 (0.22)                                          |                                                                  |
| SPARK              | GLY/IND 110/50<br>vs TIO 18          | 12    | 70.00 (13.79)                                                      | -3.00 (0.88)                                          |                                                      |                                                                  |
|                    |                                      | 24    | 70.00 (13.79)                                                      | -1.60 (0.92)                                          |                                                      |                                                                  |
| SHINE              | GLY/IND 110/50<br>vs PBO             | 12    | 230.00 (17.86)                                                     | -3.99 (0.76 <sup>a</sup> )                            | 1.22 (0.26)                                          |                                                                  |
|                    |                                      | 24    | 200.00 (17.86)                                                     | -3.01 (1.04)                                          | 1.09 (0.24)                                          | -0.96 (0.17)                                                     |
| SHINE              | TIO 18 vs PBO                        | 12    | 130.00 (17.86)                                                     | -2.37 (0.76 <sup>a</sup> )                            | 0.59 (0.27)                                          |                                                                  |
|                    |                                      | 24    | 130.00 (17.86)                                                     | -0.88 (1.04)                                          | 0.58 (0.24)                                          | -0.41 (0.17)                                                     |
| Tashkin 2009       | TIO 18 + FOR 12 vs<br>TIO 18         | 12    | 90.00 (28.06)                                                      | -1.01 (1.49 <sup>a</sup> )                            | 0.07 (0.39)                                          | -0.25 (0.32 <sup>a</sup> )                                       |
|                    |                                      | 24    |                                                                    |                                                       |                                                      |                                                                  |
| Vogelmeier<br>2008 | TIO 18 + FOR 10 vs<br>PBO            | 12    |                                                                    |                                                       |                                                      |                                                                  |
|                    |                                      | 24    |                                                                    | -2.93 (1.33)                                          |                                                      |                                                                  |
| Vogelmeier<br>2008 | TIO 18 + FOR 10 vs<br>TIO 18         | 12    |                                                                    |                                                       |                                                      |                                                                  |
|                    |                                      | 24    |                                                                    | -0.88 (1.84)                                          |                                                      |                                                                  |
| Vogelmeier<br>2008 | TIO 18 vs PBO                        | 12    |                                                                    |                                                       |                                                      |                                                                  |
|                    |                                      | 24    |                                                                    | -2.05 (1.27)                                          |                                                      |                                                                  |



| Study         | Treatment     | Weeks | Trough FEV <sub>1</sub> in mL<br>(difference in CFB),<br>mean (SE) | SGRQ total score<br>(difference in CFB),<br>mean (SE) | TDI focal score<br>(difference in TDI),<br>mean (SE) | Rescue medication use<br>(difference in puffs/day),<br>mean (SE) |
|---------------|---------------|-------|--------------------------------------------------------------------|-------------------------------------------------------|------------------------------------------------------|------------------------------------------------------------------|
| Beeh 2006     | TIO 18 vs PBO | 12    | 79.00 (17.00)                                                      |                                                       |                                                      |                                                                  |
|               |               | 24    |                                                                    |                                                       |                                                      |                                                                  |
| Brusasco 2003 | TIO 18 vs PBO | 12    | 120.00 (100.00)                                                    | -2.7 (0.99)                                           | 1.10 (0.30)                                          |                                                                  |
|               |               | 24    |                                                                    |                                                       |                                                      |                                                                  |
| Casaburi 2000 | TIO 18 vs PBO | 12    | 150.00 (14.00)                                                     |                                                       |                                                      |                                                                  |
|               |               | 24    |                                                                    |                                                       |                                                      |                                                                  |
| Casaburi 2002 | TIO 18 vs PBO | 12    | 133.00 (14.54 <sup>a</sup> )                                       | -3.08 (0.83 <sup>a</sup> )                            | 0.95 (0.18)                                          |                                                                  |
|               |               | 24    | 170.00 (18.65 <sup>a</sup> )                                       |                                                       | 0.85 (0.19)                                          |                                                                  |
| Chan 2007     | TIO 18 vs PBO | 12    | 100.00 (15.00)                                                     |                                                       |                                                      |                                                                  |
|               |               | 24    |                                                                    |                                                       |                                                      |                                                                  |
| Covelli 2005  | TIO 18 vs PBO | 12    | 184.00 (37.00)                                                     |                                                       |                                                      |                                                                  |
|               |               | 24    |                                                                    |                                                       |                                                      |                                                                  |
| Donohue 2002  | TIO 18 vs PBO | 12    | 137.00 (20.00)                                                     | -2.71 (1.34 <sup>a</sup> )                            | 1.02 (0.35 <sup>a</sup> )                            | -1.45 (0.28 <sup>a</sup> )                                       |
|               |               | 24    |                                                                    |                                                       |                                                      |                                                                  |
| Donohue 2010  | TIO 18 vs PBO | 12    | 140.00 (20.41)                                                     | -1.10 (0.87)                                          | 0.75 (0.22)                                          |                                                                  |
|               |               | 24    | 140.00 (20.41)                                                     | -1.00 (0.92)                                          | 0.87 (0.23)                                          |                                                                  |
| GLOW2         | TIO 18 vs PBO | 12    | 83.00 (19.00)                                                      | -2.84 (0.97)                                          | 0.26 (0.30)                                          |                                                                  |
|               |               | 24    | 84.00 (21.60)                                                      | -2.52 (1.11)                                          | 0.94 (0.30)                                          |                                                                  |

| <b>Study</b>          | <b>Treatment</b> | <b>Weeks</b> | <b>Trough FEV<sub>1</sub> in mL<br/>(difference in CFB),<br/>mean (SE)</b> | <b>SGRQ total score<br/>(difference in CFB),<br/>mean (SE)</b> | <b>TDI focal score<br/>(difference in TDI),<br/>mean (SE)</b> | <b>Rescue medication use<br/>(difference in puffs/day),<br/>mean (SE)</b> |
|-----------------------|------------------|--------------|----------------------------------------------------------------------------|----------------------------------------------------------------|---------------------------------------------------------------|---------------------------------------------------------------------------|
| Moita 2008            | TIO 18 vs PBO    | 12           | 102.00 (31.38)                                                             |                                                                |                                                               |                                                                           |
|                       |                  | 24           |                                                                            |                                                                |                                                               |                                                                           |
| Niewoehner<br>2005    | TIO 18 vs PBO    | 12           | 100.00 (10.00)                                                             |                                                                |                                                               |                                                                           |
|                       |                  | 24           | 100.00 (13.00)                                                             |                                                                |                                                               |                                                                           |
| TIPHON                | TIO 18 vs PBO    | 12           |                                                                            | -3.59 (1.22)                                                   |                                                               |                                                                           |
|                       |                  | 24           |                                                                            | -3.51 (0.65)                                                   |                                                               |                                                                           |
| Troosters 2014        | TIO 18 vs PBO    | 12           |                                                                            |                                                                |                                                               |                                                                           |
|                       |                  | 24           | 140.00 (22.96)                                                             |                                                                |                                                               |                                                                           |
| UPLIFT                | TIO 18 vs PBO    | 12           |                                                                            |                                                                |                                                               |                                                                           |
|                       |                  | 24           | 100.00 (7.00)                                                              | -2.5 (0.36)                                                    |                                                               |                                                                           |
| Verkindre 2006        | TIO 18 vs PBO    | 12           | 110.00 (40.00)                                                             | -6.50 (2.90)                                                   | 1.28 (0.89)                                                   | -0.13 (0.25)                                                              |
|                       |                  | 24           |                                                                            |                                                                |                                                               |                                                                           |
| Abrahams<br>2012/2013 | TIO 5 vs PBO     | 12           | 119.95 (14.97)                                                             | -3.30 (0.28)                                                   | 0.68 (0.18)                                                   |                                                                           |
|                       |                  | 24           | 126.10 (15.14)                                                             | -3.50 (0.94 <sup>a</sup> )                                     | 0.52 (0.23)                                                   |                                                                           |
| Bateman 2010a         | TIO 5 vs PBO     | 12           |                                                                            |                                                                |                                                               |                                                                           |
|                       |                  | 24           | 103.00 (7.65)                                                              | -2.20 (0.46 <sup>a</sup> )                                     |                                                               |                                                                           |
| Bateman 2010b         | TIO 5 vs PBO     | 12           |                                                                            |                                                                |                                                               |                                                                           |
|                       |                  | 24           | 123.10 (16.89 <sup>a</sup> )                                               |                                                                |                                                               |                                                                           |

| <b>Study</b> | <b>Treatment</b> | <b>Weeks</b> | <b>Trough FEV<sub>1</sub> in mL<br/>(difference in CFB),<br/>mean (SE)</b> | <b>SGRQ total score<br/>(difference in CFB),<br/>mean (SE)</b> | <b>TDI focal score<br/>(difference in TDI),<br/>mean (SE)</b> | <b>Rescue medication use<br/>(difference in puffs/day),<br/>mean (SE)</b> |
|--------------|------------------|--------------|----------------------------------------------------------------------------|----------------------------------------------------------------|---------------------------------------------------------------|---------------------------------------------------------------------------|
| OTEMTO 1     | TIO 5 vs PBO     | 12           | 134.00 (19.00)                                                             | -2.40 (1.03)                                                   | 1.45 (0.27)                                                   |                                                                           |
|              |                  | 24           |                                                                            |                                                                |                                                               |                                                                           |
| OTEMTO 2     | TIO 5 vs PBO     | 12           | 127.00 (19.00)                                                             | -2.85 (0.99)                                                   | 0.61 (0.27)                                                   |                                                                           |
|              |                  | 24           |                                                                            |                                                                |                                                               |                                                                           |
| Voshaar 2008 | TIO 5 vs PBO     | 12           | 118.00 (23.00)                                                             |                                                                |                                                               |                                                                           |
|              |                  | 24           |                                                                            |                                                                |                                                               |                                                                           |

<sup>a</sup>Imputed value; <sup>b</sup>pooled data for TONADO-1 and TONADO-2 studies; <sup>c</sup>pooled data for ANHELTO 1 and ANHELTO 2 studies.

ACL, aclidinium; CFB, change from baseline; FEV<sub>1</sub>, forced expiratory volume in 1 second; FOR, formoterol; GLY, glycopyrronium; IND, indacaterol; OLO, olodaterol; PBO, placebo; SAL, salmeterol; SE, standard error; SGRQ, St George's Respiratory Questionnaire; TDI, Transition Dyspnea Index; TIO, tiotropium; UMEC, umeclidinium; VI, vilanterol.

**Supplementary Table S6: Results of the base case network meta-analysis for trough FEV<sub>1</sub> at 12 weeks (difference in change from baseline, mL)<sup>a</sup>**

| Intervention      |                                  | Comparator                      |                                |                               |                               |                               |                              |                              |                               |                             |  |  |
|-------------------|----------------------------------|---------------------------------|--------------------------------|-------------------------------|-------------------------------|-------------------------------|------------------------------|------------------------------|-------------------------------|-----------------------------|--|--|
|                   |                                  | Placebo                         | TIO 5 or 18                    | TIO 18 + FOR 12               | TIO 18 + IND 150              | ACL/FOR 400/12                | TIO 18 + OLO 5               | TIO/OLO 5/5                  | GLY/IND 27.5/15.6             | GLY/IND 110/50              |  |  |
| TIO 5 or 18       | Estimate<br>95% CrI<br>P(better) | 114.70<br>106.20 123.40<br>>99% |                                |                               |                               |                               |                              |                              |                               |                             |  |  |
| TIO 18 + FOR 12   | Estimate<br>95% CrI<br>P(better) | 151.60<br>118.80 183.10<br>>99% | 36.89<br>5.01 67.67<br>99%     |                               |                               |                               |                              |                              |                               |                             |  |  |
| TIO 18 + IND 150  | Estimate<br>95% CrI<br>P(better) | 188.60<br>170.20 207.30<br>>99% | 73.77<br>57.48 90.08<br>>99%   | 37.09<br>2.37 72.66<br>98%    |                               |                               |                              |                              |                               |                             |  |  |
| ACL/FOR 400/12    | Estimate<br>95% CrI<br>P(better) | 135.90<br>110.60 160.80<br>>99% | 21.01<br>-5.06 47.44<br>94%    | -15.61<br>-55.85 25.73<br>22% | -52.72<br>-83.79 -21.59<br>0% |                               |                              |                              |                               |                             |  |  |
| TIO 18 + OLO 5    | Estimate<br>95% CrI<br>P(better) | 165.70<br>145.30 186.20<br>>99% | 50.90<br>32.23 69.26<br>>99%   | 14.31<br>-21.77 50.65<br>78%  | -22.89<br>-47.25 2.52<br>4%   | 30.06<br>-2.58 61.66<br>96%   |                              |                              |                               |                             |  |  |
| TIO/OLO 5/5       | Estimate<br>95% CrI<br>P(better) | 170.20<br>153.50 186.90<br>>99% | 55.48<br>40.03 71.33<br>>99%   | 18.77<br>-15.53 53.81<br>85%  | -18.29<br>-41.10 4.55<br>6%   | 34.48<br>4.27 63.85<br>99%    | 4.54<br>-19.76 29.22<br>64%  |                              |                               |                             |  |  |
| GLY/IND 27.5/15.6 | Estimate<br>95% CrI<br>P(better) | 222.20<br>193.30 250.90<br>>99% | 107.30<br>77.40 137.50<br>>99% | 70.51<br>28.03 113.30<br>>99% | 33.46<br>-0.43 67.90<br>97%   | 86.29<br>48.84 124.80<br>>99% | 56.55<br>21.38 91.97<br>>99% | 51.80<br>18.21 85.51<br>>99% |                               |                             |  |  |
| GLY/IND 110/50    | Estimate<br>95% CrI<br>P(better) | 205.10<br>185.70 224.00<br>>99% | 90.27<br>72.03 108.60<br>>99%  | 53.57<br>25.22 82.05<br>>99%  | 16.56<br>-8.05 40.60<br>91%   | 69.37<br>37.30 100.50<br>>99% | 39.16<br>13.24 65.23<br>>99% | 34.79<br>11.14 58.55<br>>99% | -17.06<br>-51.55 17.17<br>17% |                             |  |  |
| UMEC/VI 62.5/25   | Estimate<br>95% CrI<br>P(better) | 208.10<br>187.90 228.20<br>>99% | 93.23<br>73.60 112.50<br>>99%  | 56.11<br>20.83 93.78<br>>99%  | 19.43<br>-6.08 44.53<br>93%   | 72.05<br>39.81 104.20<br>>99% | 42.21<br>15.90 69.38<br>>99% | 37.63<br>12.88 62.71<br>>99% | -14.26<br>-49.18 21.33<br>22% | 2.93<br>-22.66 29.09<br>58% |  |  |

<sup>a</sup>Where the probability of improved outcomes using therapy A vs therapy B is X%, the probability of improved outcomes using therapy B vs therapy A is (100-X)%.

ACL, acclidinium; CrI, credible interval; FEV<sub>1</sub>, forced expiratory volume in 1 second; FOR, formoterol; GLY, glycopyrronium; IND, indacaterol; OLO, olodaterol; TIO, tiotropium; UMEC, umeclidinium; VI, vilanterol.

**Supplementary Table S7: Results of the base case network meta-analysis for trough FEV<sub>1</sub> at 24 weeks (difference in change from baseline, mL)<sup>a</sup>**

| Intervention    |           | Comparator    |               |                 |                 |                |              |                |
|-----------------|-----------|---------------|---------------|-----------------|-----------------|----------------|--------------|----------------|
|                 |           | Placebo       | TIO 5 or 18   | TIO 18 + SAL 50 | TIO 18 + FOR 12 | ACL/FOR 400/12 | TIO/OLO 5/5  | GLY/IND 110/50 |
| TIO 5 or 18     | Estimate  | 110.90        |               |                 |                 |                |              |                |
|                 | 95% CrI   | 102.90 118.90 |               |                 |                 |                |              |                |
|                 | P(better) | >99%          |               |                 |                 |                |              |                |
| TIO 18 + SAL 50 | Estimate  | 123.60        | 12.72         |                 |                 |                |              |                |
|                 | 95% CrI   | 39.40 215.90  | -71.21 104.50 |                 |                 |                |              |                |
|                 | P(better) | >99%          | 61%           |                 |                 |                |              |                |
| TIO 18 + FOR 12 | Estimate  | 113.50        | 2.64          | -10.20          |                 |                |              |                |
|                 | 95% CrI   | 76.33 150.40  | -34.16 39.06  | -109.10 81.73   |                 |                |              |                |
|                 | P(better) | >99%          | 56%           | 42%             |                 |                |              |                |
| ACL/FOR 400/12  | Estimate  | 138.20        | 27.33         | 15.03           | 24.64           |                |              |                |
|                 | 95% CrI   | 117.90 158.30 | 5.65 48.95    | -80.30 101.60   | -17.54 67.69    |                |              |                |
|                 | P(better) | >99%          | >99%          | 62%             | 87%             |                |              |                |
| TIO/OLO 5/5     | Estimate  | 172.10        | 61.21         | 48.59           | 58.54           | 33.83          |              |                |
|                 | 95% CrI   | 152.70 191.70 | 43.54 79.01   | -45.86 133.50   | 18.22 99.60     | 5.96 62.05     |              |                |
|                 | P(better) | >99%          | >99%          | 85%             | >99%            | 98%            |              |                |
| GLY/IND 110/50  | Estimate  | 181.80        | 70.99         | 58.24           | 68.16           | 43.63          | 9.66         |                |
|                 | 95% CrI   | 162.50 200.90 | 52.76 89.04   | -35.31 143.60   | 36.93 100.10    | 15.72 71.35    | -15.53 35.11 |                |
|                 | P(better) | >99%          | >99%          | 89%             | >99%            | >99%           | 78%          |                |
| UMEC/VI 62.5/25 | Estimate  | 195.80        | 84.92         | 72.27           | 82.43           | 57.47          | 23.74        | 13.87          |
|                 | 95% CrI   | 174.80 217.30 | 64.61 105.50  | -21.21 158.20   | 40.01 124.10    | 28.76 87.14    | -3.31 50.73  | -12.98 41.33   |
|                 | P(better) | >99%          | >99%          | 94%             | >99%            | >99%           | 96%          | 84%            |

<sup>a</sup>Where the probability of improved outcomes using therapy A vs therapy B is X%, the probability of improved outcomes using therapy B vs therapy A is (100-X)%.

ACL, acclidinium; CrI, credible interval; FEV<sub>1</sub>, forced expiratory volume in 1 second; FOR, formoterol; GLY, glycopyrronium; IND, indacaterol; OLO, olodaterol; SAL, salmeterol; TIO, tiotropium; UMEC, umeclidinium; VI, vilanterol.

**Supplementary Table S8: Results of the base case network meta-analysis for SGRQ total score at 12 weeks (difference in change from baseline)<sup>a</sup>**

| Intervention      |           | Comparator |       |             |       |                 |      |                |      |             |      |                   |      |                |      |
|-------------------|-----------|------------|-------|-------------|-------|-----------------|------|----------------|------|-------------|------|-------------------|------|----------------|------|
|                   |           | Placebo    |       | TIO 5 or 18 |       | TIO 18 + FOR 12 |      | TIO 18 + OLO 5 |      | TIO/OLO 5/5 |      | GLY/IND 27.5/15.6 |      | GLY/IND 110/50 |      |
| TIO 5 or 18       | Estimate  | -2.97      |       |             |       |                 |      |                |      |             |      |                   |      |                |      |
|                   | 95% CrI   | -3.41      | -2.53 |             |       |                 |      |                |      |             |      |                   |      |                |      |
|                   | P(better) | >99%       |       |             |       |                 |      |                |      |             |      |                   |      |                |      |
| TIO 18 + FOR 12   | Estimate  | -3.99      |       | -1.01       |       |                 |      |                |      |             |      |                   |      |                |      |
|                   | 95% CrI   | -6.94      | -1.03 | -3.94       | 1.89  |                 |      |                |      |             |      |                   |      |                |      |
|                   | P(better) | >99%       |       | 75%         |       |                 |      |                |      |             |      |                   |      |                |      |
| TIO 18 + OLO 5    | Estimate  | -4.82      |       | -1.85       |       | -0.84           |      |                |      |             |      |                   |      |                |      |
|                   | 95% CrI   | -5.82      | -3.82 | -2.75       | -0.95 | -3.90           | 2.24 |                |      |             |      |                   |      |                |      |
|                   | P(better) | >99%       |       | >99%        |       | 71%             |      |                |      |             |      |                   |      |                |      |
| TIO/OLO 5/5       | Estimate  | -4.90      |       | -1.93       |       | -0.90           |      | -0.07          |      |             |      |                   |      |                |      |
|                   | 95% CrI   | -6.10      | -3.68 | -3.13       | -0.71 | -4.07           | 2.26 | -1.58          | 1.43 |             |      |                   |      |                |      |
|                   | P(better) | >99%       |       | >99%        |       | 71%             |      | 54%            |      |             |      |                   |      |                |      |
| GLY/IND 27.5/15.6 | Estimate  | -4.97      |       | -2.01       |       | -0.99           |      | -0.15          |      | -0.08       |      |                   |      |                |      |
|                   | 95% CrI   | -6.42      | -3.52 | -3.51       | -0.49 | -4.27           | 2.30 | -1.91          | 1.61 | -1.96       | 1.82 |                   |      |                |      |
|                   | P(better) | >99%       |       | >99%        |       | 72%             |      | 57%            |      | 53%         |      |                   |      |                |      |
| GLY/IND 110/50    | Estimate  | -4.89      |       | -1.92       |       | -0.91           |      | -0.07          |      | 0.00        |      | 0.08              |      |                |      |
|                   | 95% CrI   | -5.98      | -3.80 | -2.97       | -0.87 | -3.99           | 2.21 | -1.46          | 1.32 | -1.59       | 1.59 | -1.73             | 1.90 |                |      |
|                   | P(better) | >99%       |       | >99%        |       | 72%             |      | 54%            |      | 50%         |      | 47%               |      |                |      |
| UMEC/VI 62.5/25   | Estimate  | -4.70      |       | -1.73       |       | -0.72           |      | 0.12           |      | 0.20        |      | 0.27              |      | 0.19           |      |
|                   | 95% CrI   | -5.72      | -3.68 | -2.70       | -0.77 | -3.79           | 2.36 | -1.20          | 1.44 | -1.35       | 1.71 | -1.50             | 2.04 | -1.23          | 1.61 |
|                   | P(better) | >99%       |       | >99%        |       | 68%             |      | 43%            |      | 40%         |      | 38%               |      | 40%            |      |

<sup>a</sup>Where the probability of improved outcomes using therapy A vs therapy B is X%, the probability of improved outcomes using therapy B vs therapy A is (100-X)%.

CrI, credible interval; FOR, formoterol; GLY, glycopyrronium; IND, indacaterol; OLO, olodaterol; SGRQ, St George's Respiratory Questionnaire; TIO, tiotropium; UMEC, umeclidinium; VI, vilanterol.

**Supplementary Table S9: Results of the base case network meta-analysis for SGRQ total score at 24 weeks (difference in change from baseline)<sup>a</sup>**

| Intervention    |           | Comparator |       |             |       |                 |      |                 |      |                |      |             |      |                |      |
|-----------------|-----------|------------|-------|-------------|-------|-----------------|------|-----------------|------|----------------|------|-------------|------|----------------|------|
|                 |           | Placebo    |       | TIO 5 or 18 |       | TIO 18 + FOR 10 |      | TIO 18 + SAL 50 |      | ACL/FOR 400/12 |      | TIO/OLO 5/5 |      | GLY/IND 110/50 |      |
| TIO 5 or 18     | Estimate  | -2.53      |       |             |       |                 |      |                 |      |                |      |             |      |                |      |
|                 | 95% CrI   | -2.94      | -2.12 |             |       |                 |      |                 |      |                |      |             |      |                |      |
|                 | P(better) | >99%       |       |             |       |                 |      |                 |      |                |      |             |      |                |      |
| TIO 18 + FOR 10 | Estimate  | -3.18      |       | -0.64       |       |                 |      |                 |      |                |      |             |      |                |      |
|                 | 95% CrI   | -5.46      | -0.89 | -2.93       | 1.64  |                 |      |                 |      |                |      |             |      |                |      |
|                 | P(better) | >99%       |       | 71%         |       |                 |      |                 |      |                |      |             |      |                |      |
| TIO 18 + SAL 50 | Estimate  | -4.00      |       | -1.47       |       | -0.83           |      |                 |      |                |      |             |      |                |      |
|                 | 95% CrI   | -5.42      | -2.59 | -2.83       | -0.11 | -3.49           | 1.84 |                 |      |                |      |             |      |                |      |
|                 | P(better) | >99%       |       | 98%         |       | 73%             |      |                 |      |                |      |             |      |                |      |
| ACL/FOR 400/12  | Estimate  | -2.80      |       | -0.27       |       | 0.37            |      | 1.20            |      |                |      |             |      |                |      |
|                 | 95% CrI   | -4.37      | -1.22 | -1.89       | 1.36  | -2.40           | 3.15 | -0.92           | 3.32 |                |      |             |      |                |      |
|                 | P(better) | >99%       |       | 63%         |       | 40%             |      | 13%             |      |                |      |             |      |                |      |
| TIO/OLO 5/5     | Estimate  | -3.76      |       | -1.23       |       | -0.58           |      | 0.24            |      | -0.96          |      |             |      |                |      |
|                 | 95% CrI   | -4.92      | -2.60 | -2.32       | -0.14 | -3.11           | 1.95 | -1.49           | 1.97 | -2.91          | 0.99 |             |      |                |      |
|                 | P(better) | >99%       |       | 99%         |       | 68%             |      | 39%             |      | 83%            |      |             |      |                |      |
| GLY/IND 110/50  | Estimate  | -4.29      |       | -1.76       |       | -1.12           |      | -0.28           |      | -1.49          |      | -0.53       |      |                |      |
|                 | 95% CrI   | -5.34      | -3.23 | -2.75       | -0.76 | -3.59           | 1.39 | -1.97           | 1.40 | -3.38          | 0.40 | -2.00       | 0.95 |                |      |
|                 | P(better) | >99%       |       | >99%        |       | 81%             |      | 63%             |      | 94%            |      | 76%         |      |                |      |
| UMEC/VI 62.5/25 | Estimate  | -4.11      |       | -1.58       |       | -0.93           |      | -0.10           |      | -1.31          |      | -0.35       |      | 0.18           |      |
|                 | 95% CrI   | -5.23      | -2.99 | -2.65       | -0.51 | -3.45           | 1.59 | -1.84           | 1.63 | -3.24          | 0.60 | -1.87       | 1.17 | -1.28          | 1.63 |
|                 | P(better) | >99%       |       | >99%        |       | 77%             |      | 55%             |      | 91%            |      | 67%         |      | 40%            |      |

<sup>a</sup>Where the probability of improved outcomes using therapy A vs therapy B is X%, the probability of improved outcomes using therapy B vs therapy A is (100-X)%.

ACL, acclidinium; CrI, credible interval; FOR, formoterol; GLY, glycopyrronium; IND, indacaterol; OLO, olodaterol; SAL, salmeterol; SGRQ, St George's Respiratory Questionnaire; TIO, tiotropium; UMEC, umeclidinium; VI, vilanterol.

**Supplementary Table S10: Results of the base case network meta-analysis for TDI focal score at 12 weeks (difference in TDI)<sup>a</sup>**

| Intervention      |           | Comparator |             |                 |             |                   |                |  |
|-------------------|-----------|------------|-------------|-----------------|-------------|-------------------|----------------|--|
|                   |           | Placebo    | TIO 5 or 18 | TIO 18 + FOR 12 | TIO/OLO 5/5 | GLY/IND 27.5/15.6 | GLY/IND 110/50 |  |
| TIO 5 or 18       | Estimate  | 0.79       |             |                 |             |                   |                |  |
|                   | 95% CrI   | 0.52 1.06  |             |                 |             |                   |                |  |
|                   | P(better) | >99%       |             |                 |             |                   |                |  |
| TIO 18 + FOR 12   | Estimate  | 0.86       | 0.07        |                 |             |                   |                |  |
|                   | 95% CrI   | -0.12 1.85 | -0.88 1.02  |                 |             |                   |                |  |
|                   | P(better) | 96%        | 56%         |                 |             |                   |                |  |
| TIO/OLO 5/5       | Estimate  | 1.50       | 0.71        | 0.64            |             |                   |                |  |
|                   | 95% CrI   | 1.01 2.00  | 0.22 1.21   | -0.43 1.71      |             |                   |                |  |
|                   | P(better) | >99%       | >99%        | 89%             |             |                   |                |  |
| GLY/IND 27.5/15.6 | Estimate  | 1.62       | 0.83        | 0.76            | 0.12        |                   |                |  |
|                   | 95% CrI   | 1.07 2.17  | 0.22 1.45   | -0.36 1.89      | -0.62 0.86  |                   |                |  |
|                   | P(better) | >99%       | >99%        | 91%             | 64%         |                   |                |  |
| GLY/IND 110/50    | Estimate  | 1.34       | 0.55        | 0.48            | -0.16       | -0.28             |                |  |
|                   | 95% CrI   | 0.67 1.99  | -0.11 1.20  | -0.68 1.63      | -0.97 0.63  | -1.14 0.57        |                |  |
|                   | P(better) | >99%       | 96%         | 80%             | 33%         | 24%               |                |  |
| UMEC/VI 62.5/25   | Estimate  | 1.24       | 0.45        | 0.38            | -0.25       | -0.37             | -0.10          |  |
|                   | 95% CrI   | 0.77 1.73  | 0.00 0.92   | -0.68 1.44      | -0.91 0.40  | -1.11 0.36        | -0.87 0.70     |  |
|                   | P(better) | >99%       | 97%         | 77%             | 20%         | 14%               | 39%            |  |

<sup>a</sup>Where the probability of improved outcomes using therapy A vs therapy B is X%, the probability of improved outcomes using therapy B vs therapy A is (100-X)%.

CrI, credible interval; FOR, formoterol; GLY, glycopyrronium; IND, indacaterol; OLO, olodaterol; TDI, Transition Dyspnea Index; TIO, tiotropium; UMEC, umeclidinium; VI, vilanterol.



**Supplementary Table S11: Results of the base case network meta-analysis for TDI focal score at 24 weeks (difference in TDI)<sup>a</sup>**

| Intervention    |           | Comparator |             |                 |                 |                |             |                |  |
|-----------------|-----------|------------|-------------|-----------------|-----------------|----------------|-------------|----------------|--|
|                 |           | Placebo    | TIO 5 or 18 | TIO 18 + SAL 50 | TIO 18 + FOR 12 | ACL/FOR 400/12 | TIO/OLO 5/5 | GLY/IND 110/50 |  |
| TIO 5 or 18     | Estimate  | 0.83       |             |                 |                 |                |             |                |  |
|                 | 95% CrI   | 0.65 1.01  |             |                 |                 |                |             |                |  |
|                 | P(better) | >99%       |             |                 |                 |                |             |                |  |
| TIO 18 + SAL 50 | Estimate  | 0.41       | -0.42       |                 |                 |                |             |                |  |
|                 | 95% CrI   | -0.46 1.27 | -1.27 0.42  |                 |                 |                |             |                |  |
|                 | P(better) | 82%        | 16%         |                 |                 |                |             |                |  |
| TIO 18 + FOR 12 | Estimate  | 0.93       | 0.10        | 0.52            |                 |                |             |                |  |
|                 | 95% CrI   | 0.41 1.44  | -0.40 0.59  | -0.46 1.50      |                 |                |             |                |  |
|                 | P(better) | >99%       | 65%         | 85%             |                 |                |             |                |  |
| ACL/FOR 400/12  | Estimate  | 1.37       | 0.54        | 0.96            | 0.44            |                |             |                |  |
|                 | 95% CrI   | 0.98 1.76  | 0.12 0.97   | 0.02 1.91       | -0.21 1.09      |                |             |                |  |
|                 | P(better) | >99%       | >99%        | 98%             | 91%             |                |             |                |  |
| TIO/OLO 5/5     | Estimate  | 1.19       | 0.36        | 0.78            | 0.26            | -0.18          |             |                |  |
|                 | 95% CrI   | 0.87 1.51  | 0.09 0.63   | -0.10 1.67      | -0.30 0.82      | -0.68 0.32     |             |                |  |
|                 | P(better) | >99%       | >99%        | 96%             | 82%             | 24%            |             |                |  |
| GLY/IND 110/50  | Estimate  | 1.31       | 0.48        | 0.90            | 0.38            | -0.06          | 0.12        |                |  |
|                 | 95% CrI   | 1.03 1.58  | 0.25 0.71   | 0.03 1.78       | -0.06 0.82      | -0.54 0.41     | -0.23 0.47  |                |  |
|                 | P(better) | >99%       | >99%        | 98%             | 96%             | 40%            | 75%         |                |  |
| UMEC/VI 62.5/25 | Estimate  | 1.01       | 0.18        | 0.61            | 0.08            | -0.36          | -0.18       | -0.30          |  |
|                 | 95% CrI   | 0.66 1.36  | -0.16 0.53  | -0.31 1.52      | -0.52 0.68      | -0.88 0.16     | -0.61 0.26  | -0.71 0.11     |  |
|                 | P(better) | >99%       | 85%         | 90%             | 61%             | 9%             | 21%         | 8%             |  |

<sup>a</sup>Where the probability of improved outcomes using therapy A vs therapy B is X%, the probability of improved outcomes using therapy B vs therapy A is (100-X)%.

ACL, acclidinium; CrI, credible interval; FOR, formoterol; GLY, glycopyrronium; IND, indacaterol; OLO, olodaterol; SAL, salmeterol; TDI, Transition Dyspnea Index; TIO, tiotropium; UMEC, umeclidinium; VI, vilanterol.

**Supplementary Table S12: Results of the base case network meta-analysis for rescue medication use at 12 weeks (difference in change from baseline, puffs/day)<sup>a</sup>**

| Intervention      |           | Comparator  |             |                 |                  |             |                   |  |
|-------------------|-----------|-------------|-------------|-----------------|------------------|-------------|-------------------|--|
|                   |           | Placebo     | TIO 5 or 18 | TIO 18 + FOR 12 | TIO 18 + IND 150 | TIO/OLO 5/5 | GLY/IND 27.5/15.6 |  |
| TIO 5 or 18       | Estimate  | -0.29       |             |                 |                  |             |                   |  |
|                   | 95% CrI   | -0.64 0.06  |             |                 |                  |             |                   |  |
|                   | P(better) | 95%         |             |                 |                  |             |                   |  |
| TIO 18 + FOR 12   | Estimate  | -0.54       | -0.25       |                 |                  |             |                   |  |
|                   | 95% CrI   | -1.26 0.17  | -0.87 0.37  |                 |                  |             |                   |  |
|                   | P(better) | 93%         | 78%         |                 |                  |             |                   |  |
| TIO 18 + IND 150  | Estimate  | -1.16       | -0.87       | -0.62           |                  |             |                   |  |
|                   | 95% CrI   | -1.58 -0.74 | -1.10 -0.64 | -1.28 0.04      |                  |             |                   |  |
|                   | P(better) | >99%        | >99%        | 97%             |                  |             |                   |  |
| TIO/OLO 5/5       | Estimate  | -0.97       | -0.68       | -0.43           | 0.19             |             |                   |  |
|                   | 95% CrI   | -1.38 -0.56 | -0.89 -0.46 | -1.09 0.22      | -0.12 0.50       |             |                   |  |
|                   | P(better) | >99%        | >99%        | 90%             | 12%              |             |                   |  |
| GLY/IND 27.5/15.6 | Estimate  | -1.19       | -0.90       | -0.65           | -0.03            | -0.22       |                   |  |
|                   | 95% CrI   | -1.45 -0.93 | -1.33 -0.46 | -1.41 0.11      | -0.52 0.46       | -0.70 0.26  |                   |  |
|                   | P(better) | >99%        | >99%        | 95%             | 55%              | 81%         |                   |  |
| UMEC/VI 62.5/25   | Estimate  | -0.84       | -0.55       | -0.30           | 0.32             | 0.13        | 0.35              |  |
|                   | 95% CrI   | -1.19 -0.49 | -0.73 -0.38 | -0.94 0.34      | 0.03 0.61        | -0.15 0.41  | -0.09 0.78        |  |
|                   | P(better) | >99%        | >99%        | 82%             | 2%               | 18%         | 6%                |  |

<sup>a</sup>Where the probability of improved outcomes using therapy A vs therapy B is X%, the probability of improved outcomes using therapy B vs therapy A is (100-X)%.

CrI, credible interval; FOR, formoterol; GLY, glycopyrronium; IND, indacaterol; OLO, olodaterol; TIO, tiotropium; UMEC, umeclidinium; VI, vilanterol.

**Supplementary Table S13: Results of the base case network meta-analysis for rescue medication use at 24 weeks (difference in change from baseline, puffs/day)<sup>a</sup>**

| Intervention    |           | Comparator  |             |                |             |                |
|-----------------|-----------|-------------|-------------|----------------|-------------|----------------|
|                 |           | Placebo     | TIO 5 or 18 | ACL/FOR 400/12 | TIO/OLO 5/5 | GLY/IND 110/50 |
| TIO 5 or 18     | Estimate  | -0.65       |             |                |             |                |
|                 | 95% CrI   | -1.26 -0.11 |             |                |             |                |
|                 | P(better) | 99%         |             |                |             |                |
| ACL/FOR 400/12  | Estimate  | -0.66       | -0.01       |                |             |                |
|                 | 95% CrI   | -1.75 0.44  | -1.22 1.26  |                |             |                |
|                 | P(better) | 92%         | 51%         |                |             |                |
| TIO/OLO 5/5     | Estimate  | -1.28       | -0.63       | -0.62          |             |                |
|                 | 95% CrI   | -2.52 -0.12 | -1.69 0.42  | -2.28 0.96     |             |                |
|                 | P(better) | 98%         | 92%         | 85%            |             |                |
| GLY/IND 110/50  | Estimate  | -1.09       | -0.43       | -0.42          | 0.19        |                |
|                 | 95% CrI   | -2.07 -0.12 | -1.39 0.56  | -1.90 1.03     | -1.22 1.67  |                |
|                 | P(better) | 98%         | 87%         | 78%            | 34%         |                |
| UMEC/VI 62.5/25 | Estimate  | -1.13       | -0.48       | -0.47          | 0.15        | -0.05          |
|                 | 95% CrI   | -1.86 -0.46 | -1.05 0.10  | -1.80 0.80     | -1.04 1.37  | -1.16 1.03     |
|                 | P(better) | >99%        | 96%         | 83%            | 35%         | 55%            |

<sup>a</sup>Where the probability of improved outcomes using therapy A vs therapy B is X%, the probability of improved outcomes using therapy B vs therapy A is (100-X)%.

ACL, aclidinium; CrI, credible interval; FOR, formoterol; GLY, glycopyrronium; IND, indacaterol; OLO, olodaterol; TIO, tiotropium; UMEC, umeclidinium; VI, vilanterol.

**Supplementary Table S14: Results of the network meta-analysis for trough FEV<sub>1</sub>, at 24 weeks (difference in CFB, mL [95% CrI]) for ICS users and ICS non-users<sup>a</sup>**

| Intervention    |           | Comparator       |                  |                 |                 |                  |                 |                 |                 |                 |                 |
|-----------------|-----------|------------------|------------------|-----------------|-----------------|------------------|-----------------|-----------------|-----------------|-----------------|-----------------|
|                 |           | Placebo          |                  | TIO 5 or 18     |                 | TIO 18 + FOR 12  |                 | TIO/OLO 5/5     |                 | GLY/IND 110/50  |                 |
|                 |           | ICS users        | ICS non-users    | ICS users       | ICS non-users   | ICS users        | ICS non-users   | ICS users       | ICS non-users   | ICS users       | ICS non-users   |
| TIO 5 or 18     | Estimate  | 109.40           | 159.00           |                 |                 |                  |                 |                 |                 |                 |                 |
|                 | 95% CrI   | (68.88, 150.60)  | (111.40, 207.10) |                 |                 |                  |                 |                 |                 |                 |                 |
|                 | P(better) | >99%             | >99%             |                 |                 |                  |                 |                 |                 |                 |                 |
| TIO 18 + FOR 12 | Estimate  | 118.30           | 161.50           | 8.69            | 2.56            |                  |                 |                 |                 |                 |                 |
|                 | 95% CrI   | (50.07, 186.70)  | (93.60, 229.80)  | (-53.09, 71.19) | (-56.94, 62.20) |                  |                 |                 |                 |                 |                 |
|                 | P(better) | >99%             | >99%             | 61%             | 53%             |                  |                 |                 |                 |                 |                 |
| TIO/OLO 5/5     | Estimate  | 154.40           | 234.90           | 44.99           | 75.96           | 36.21            | 73.35           |                 |                 |                 |                 |
|                 | 95% CrI   | (107.70, 201.90) | (182.10, 288.60) | (21.53, 68.56)  | (52.50, 99.53)  | (-30.45, 102.60) | (9.13, 137.20)  |                 |                 |                 |                 |
|                 | P(better) | >99%             | >99%             | >99%            | >99%            | 86%              | 99%             |                 |                 |                 |                 |
| GLY/IND 110/50  | Estimate  | 178.80           | 238.10           | 69.40           | 79.22           | 60.54            | 76.58           | 24.42           | 3.29            |                 |                 |
|                 | 95% CrI   | (134.20, 223.80) | (185.70, 290.80) | (34.16, 104.50) | (38.16, 120.00) | (8.85, 111.90)   | (32.89, 120.00) | (-18.36, 66.68) | (-44.38, 50.40) |                 |                 |
|                 | P(better) | >99%             | >99%             | >99%            | >99%            | 99%              | >99%            | 87%             | 55%             |                 |                 |
| UMEC/VI 62.5/25 | Estimate  | 179.50           | 279.80           | 69.99           | 120.90          | 61.16            | 118.20          | 24.95           | 44.87           | 0.67            | 41.72           |
|                 | 95% CrI   | (127.00, 232.30) | (221.40, 338.40) | (36.72, 103.30) | (87.10, 154.70) | (-9.49, 131.70)  | (49.53, 186.90) | (-16.04, 65.67) | (3.46, 86.00)   | (-47.73, 48.95) | (-11.33, 94.79) |
|                 | P(better) | >99%             | >99%             | >99%            | >99%            | 95%              | >99%            | 88%             | 98%             | 51%             | 94%             |

<sup>a</sup>Where the probability of improved outcomes using therapy A vs therapy B is X%, the probability of improved outcomes using therapy B vs therapy A is (100-X)%.

CFB, change from baseline; CrI, credible interval; FEV<sub>1</sub>, forced expiratory volume in 1 second; FOR, formoterol; GLY, glycopyrronium; ICS, inhaled corticosteroid; IND, indacaterol; OLO, olodaterol; TIO, tiotropium; UMEC, umeclidinium; VI, vilanterol.

**Supplementary Table S15: Results of the network meta-analysis for trough FEV<sub>1</sub>, at 24 weeks (difference in CFB, mL [95% CrI]) for patients with moderate and severe disease<sup>a</sup>**

| Intervention    |           | Comparator       |                  |                 |                 |                 |                  |                 |                 |                |                 |
|-----------------|-----------|------------------|------------------|-----------------|-----------------|-----------------|------------------|-----------------|-----------------|----------------|-----------------|
|                 |           | Placebo          |                  | TIO 5 or 18     |                 | TIO 18 + FOR 12 |                  | TIO/OLO 5/5     |                 | GLY/IND 110/50 |                 |
|                 |           | Moderate         | Severe           | Moderate        | Severe          | Moderate        | Severe           | Moderate        | Severe          | Moderate       | Severe          |
| TIO 5 or 18     | Estimate  | 157.30           | 39.16            |                 |                 |                 |                  |                 |                 |                |                 |
|                 | 95% CrI   | (128.40, 186.30) | (-12.86, 91.72)  |                 |                 |                 |                  |                 |                 |                |                 |
|                 | P(better) | >99%             | 93%              |                 |                 |                 |                  |                 |                 |                |                 |
| TIO 18 + FOR 12 | Estimate  | 146.80           | 58.46            | -10.57          | 19.27           |                 |                  |                 |                 |                |                 |
|                 | 95% CrI   | (88.52, 205.20)  | (-16.95, 133.20) | (-65.75, 45.15) | (-36.32, 75.20) |                 |                  |                 |                 |                |                 |
|                 | P(better) | >99%             | 94%              | 36%             | 75%             |                 |                  |                 |                 |                |                 |
| TIO/OLO 5/5     | Estimate  | 217.30           | 100.10           | 59.97           | 60.98           | 70.50           | 41.78            |                 |                 |                |                 |
|                 | 95% CrI   | (177.60, 257.40) | (44.16, 156.90)  | (32.55, 87.52)  | (40.05, 82.00)  | (8.60, 132.00)  | (-18.08, 101.40) |                 |                 |                |                 |
|                 | P(better) | >99%             | >99%             | >99%            | >99%            | 99%             | 91%              |                 |                 |                |                 |
| GLY/IND 110/50  | Estimate  | 230.30           | 118.90           | 73.08           | 79.82           | 83.52           | 60.53            | 13.08           | 18.83           |                |                 |
|                 | 95% CrI   | (193.00, 267.70) | (65.22, 173.10)  | (40.55, 105.50) | (59.17, 100.40) | (38.33, 128.40) | (8.41, 112.30)   | (-29.81, 55.54) | (-10.74, 48.30) |                |                 |
|                 | P(better) | >99%             | >99%             | >99%            | >99%            | >99%            | 99%              | 73%             | 89%             |                |                 |
| UMEC/VI 62.5/25 | Estimate  | 276.10           | 117.10           | 118.80          | 78.00           | 129.30          | 58.69            | 58.79           | 16.98           | 45.79          | -1.80           |
|                 | 95% CrI   | (228.50, 324.10) | (57.39, 177.50)  | (80.60, 157.10) | (48.20, 107.90) | (61.63, 196.70) | (-4.79, 121.80)  | (11.45, 105.80) | (-19.68, 53.38) | (-4.40, 95.93) | (-38.11, 34.44) |
|                 | P(better) | >99%             | >99%             | >99%            | >99%            | >99%            | 97%              | >99%            | 82%             | 96%            | 46%             |

<sup>a</sup>Where the probability of improved outcomes using therapy A vs therapy B is X%, the probability of improved outcomes using therapy B vs therapy A is (100-X)%. CFB, change from baseline; CrI, credible interval; FEV<sub>1</sub>, forced expiratory volume in 1 second; FOR, formoterol; GLY, glycopyrronium; IND, indacaterol; OLO, olodaterol; TIO, tiotropium; UMEC, umeclidinium; VI, vilanterol.

## References

1. Donohue JF, Maleki-Yazdi MR, Kilbride S, Mehta R, Kalberg C, Church A. Efficacy and safety of once-daily umeclidinium/vilanterol 62.5/25 mcg in COPD. *Respir Med*. 2013;107:1538–46.
2. GlaxoSmithKline. A 24-week Evaluation of GSK573719/Vilanterol (62.5/25mcg) and Components in COPD (NCT01313650). 2014. [Available from: <http://ClinicalTrials.gov/show/NCT01313650>]. Accessed 2 Oct 2015.
3. GlaxoSmithKline. A 24-Week, Randomized, Double-Blind, Placebo-Controlled Study to Evaluate the Efficacy and Safety of GSK573719/GW642444 Inhalation Powder and the Individual Components Delivered Once-Daily via a Novel Dry Powder Inhaler in Subjects with Chronic Obstructive Pulmonary Disease. 2014. [Available from: [https://www.clinicaltrialsregister.eu/ctr-search/search?query=eudract\\_number:2010-023349-32](https://www.clinicaltrialsregister.eu/ctr-search/search?query=eudract_number:2010-023349-32)]. Accessed 8 Oct 2015.
4. GlaxoSmithKline. 24-week Trial Comparing GSK573719/GW642444 With GSK573719 and With Tiotropium in Chronic Obstructive Pulmonary Disease. 2014. [Available from: <http://ClinicalTrials.gov/show/NCT01316913>]. Accessed 2 Oct 2015.
5. GlaxoSmithKline. A multicenter trial comparing the efficacy and safety of GSK573719/GW642444 with GSK573719 with tiotropium over 24 weeks in subjects with COPD (2010-021802-39). 2014. [Available from: <https://www.clinicaltrialsregister.eu/ctr-search/search?query=2010-021802-39>]. Accessed 8 Oct 2015.
6. GlaxoSmithKline. A Multicenter Trial Comparing the Efficacy and Safety of GSK573719/GW642444 with GSK573719 and with Tiotropium over 24 Weeks in Subjects with COPD (DB2113374): Clinical Study Report. 2012.
7. GlaxoSmithKline. 24-week Trial Comparing GSK573719/GW642444 With GW642444 and With Tiotropium in Chronic Obstructive Pulmonary Disease. 2013. [Available from: <http://ClinicalTrials.gov/show/NCT01316900>]. Accessed 2 Oct 2015.
8. GlaxoSmithKline. DB2113360: A multicenter trial comparing the efficacy and safety of GSK573719/GW642444 with GW642444 and with tiotropium over 24 weeks in subjects with COPD. 2010-021800-72. 2014. [Available from: [https://www.clinicaltrialsregister.eu/ctr-search/search?query=eudract\\_number:2010-021800-72](https://www.clinicaltrialsregister.eu/ctr-search/search?query=eudract_number:2010-021800-72)]. Accessed 8 Oct 2015.
9. GlaxoSmithKline. A Multicenter Trial Comparing the Efficacy and Safety of GSK573719/GW642444 with GW642444 and with Tiotropium over 24 Weeks in Subjects with COPD (DB2113360): Clinical Study Report. 2012.
10. GlaxoSmithKline. The Purpose of This Study is to Evaluate the Spirometric Effect (Trough FEV1) of Umeclidinium/Vilanterol 62.5/25 mcg Once Daily Compared With Tiotropium 18 mcg Once Daily Over a 24-week Treatment Period in Subjects With COPD (NCT01777334). 2013. [Available from: <http://ClinicalTrials.gov/show/NCT01777334>]. Accessed 2 Oct 2015.
11. GlaxoSmithKline. A Multicenter Trial Comparing the Efficacy and Safety of Umeclidinium/Vilanterol 62.5/25 mcg Once Daily with Tiotropium 18 mcg Once Daily over 24 Weeks in Subjects with Chronic Obstructive Pulmonary Disease (COPD). 2014. [Available from: [https://www.clinicaltrialsregister.eu/ctr-search/search?query=eudract\\_number:2012-003973-24](https://www.clinicaltrialsregister.eu/ctr-search/search?query=eudract_number:2012-003973-24)]. Accessed 8 Oct 2015.
12. GlaxoSmithKline. A Multicenter Trial Comparing the Efficacy and Safety of Umeclidinium/Vilanterol 62.5/25 mcg Once Daily with Tiotropium 18 mcg Once Daily over 24 Weeks in Subjects with Chronic Obstructive Pulmonary Disease (COPD) (ZEP117115): Clinical Study Report. 2013.
13. Aaron SD, Vandemheen KL, Fergusson D, et al. Tiotropium in combination with placebo, salmeterol, or fluticasone-salmeterol for treatment of chronic obstructive pulmonary disease: a randomized trial. *Ann Intern Med*. 2007;146:545–55.
14. OHRI. Optimal therapy of chronic obstructive pulmonary disease to prevent exacerbations and improve quality of life: a randomised, double-blind, placebo-controlled trial (ISRCTN29870041). 2006. [Available from: <http://www.controlled->

- [trials.com/mrct/trial/1990427](http://trials.com/mrct/trial/1990427)]. Accessed 8 Oct 2015. [Currently available from: <http://www.isrctn.com/ISRCTN29870041>]. Accessed 5 Jul 2017.
15. Abrahams R, Moroni-Zentgraf P, Ramsdell J, Schmidt H, Joseph E, Karpel J. Safety and efficacy of the once-daily anticholinergic BEA2180 compared with tiotropium in patients with COPD. *Respir Med*. 2013;107:854–62.
  16. Singh D, Jones PW, Bateman ED, et al. Efficacy and safety of aclidinium bromide/formoterol fumarate fixed-dose combinations compared with individual components and placebo in patients with COPD (ACLIFORM-COPD): a multicentre, randomised study. *BMC Pulm Med*. 2014;14:178.
  17. ZuWallack R, Allen L, Hernandez G, Ting N, Abrahams R. Efficacy and safety of combining olodaterol Respimat® and tiotropium HandiHaler® in patients with COPD: results of two randomized, double-blind, active-controlled studies. *Int J Chron Obstruct Pulmon Dis*. 2014;9:1133–44.
  18. D'Urzo AD, Rennard SI, Kerwin EM, et al. Efficacy and safety of fixed-dose combinations of aclidinium bromide/formoterol fumarate: the 24-week, randomized, placebo-controlled AUGMENT COPD study. *Respir Res*. 2014;15:123.
  19. Bateman ED, Tashkin D, Siafakas N, et al. A one-year trial of tiotropium Respimat plus usual therapy in COPD patients. *Respir Med*. 2010;104:1460–72.
  20. Bateman E, Singh D, Smith D, et al. Efficacy and safety of tiotropium Respimat SMI in COPD in two 1-year randomized studies. *Int J Chron Obstruct Pulmon Dis*. 2010;5:197–208.
  21. Beeh KM, Beier J, Buhl R, et al. [Efficacy of tiotropium bromide (Spiriva) in patients with chronic-obstructive pulmonary disease (COPD) of different severities]. *Pneumologie*. 2006;60:341–6.
  22. Boehringer Ingelheim. A randomised, double-blind, placebo-controlled, 12 weeks trial to evaluate the effect of Tiotropium Inhalation Capsules on the magnitude of exercise, measured using an accelerometer, in patients with Chronic Obstructive Pulmonary Disease (COPD): Clinical Study Report Boehringer Ingelheim clinical trial registry. 2007. [Available from: [http://www.trials.boehringer-ingelheim.com/public/trial\\_results\\_documents/205/205.269\\_CO.pdf](http://www.trials.boehringer-ingelheim.com/public/trial_results_documents/205/205.269_CO.pdf)]. Accessed 2 Oct 2015.
  23. Brusasco V, Hodder R, Miravittles M, Korducki L, Towse L, Kesten S. Health outcomes following treatment for six months with once daily tiotropium compared with twice daily salmeterol in patients with COPD. *Thorax*. 2003;58:399–404.
  24. Casaburi R, Briggs DD, Jr., Donohue JF, Serby CW, Menjoge SS, Witek TJ, Jr. The spirometric efficacy of once-daily dosing with tiotropium in stable COPD: a 13-week multicenter trial. The US Tiotropium Study Group. *Chest*. 2000;118:1294–302.
  25. Casaburi R, Mahler DA, Jones PW, et al. A long-term evaluation of once-daily inhaled tiotropium in chronic obstructive pulmonary disease. *Eur Respir J*. 2002;19:217–24.
  26. Chan CK, Maltais F, Sigouin C, Haddon JM, Ford GT. A randomized controlled trial to assess the efficacy of tiotropium in Canadian patients with chronic obstructive pulmonary disease. *Can Respir J*. 2007;14:465–72.
  27. Covelli H, Bhattacharya S, Cassino C, Conoscenti C, Kesten S. Absence of electrocardiographic findings and improved function with once-daily tiotropium in patients with chronic obstructive pulmonary disease. *Pharmacotherapy*. 2005;25:1708–18.
  28. Donohue JF, van Noord JA, Bateman ED, et al. A 6-month, placebo-controlled study comparing lung function and health status changes in COPD patients treated with tiotropium or salmeterol. *Chest*. 2002;122:47–55.
  29. Donohue JF, Fogarty C, Lotvall J, et al. Once-daily bronchodilators for chronic obstructive pulmonary disease: indacaterol versus tiotropium. *Am J Respir Crit Care Med*. 2010;182:155–62.
  30. Dahl R, Chapman KR, Rudolf M, et al. Safety and efficacy of dual bronchodilation with QVA149 in COPD patients: the ENLIGHTEN study. *Respir Med*. 2013;107:1558–67.

31. Novartis. A Study to Assess the Long-term Safety of QVA149 (NCT01120717). 2013. [Available from: <http://ClinicalTrials.gov/show/NCT01120717>]. Accessed 2 Oct 2015.
32. Novartis. A multicenter, randomized, double-blind, placebo-controlled study, to assess the long term safety of 52 weeks treatment with QVA149 (110µg indacaterol / 50µg glycopyrrolate) in patients with moderate to severe Chronic Obstructive Pulmonary Disease (COPD). 2014. [Available from: [https://www.clinicaltrialsregister.eu/ctr-search/search?query=eudract\\_number:2009-013235-38](https://www.clinicaltrialsregister.eu/ctr-search/search?query=eudract_number:2009-013235-38)]. Accessed 8 Oct 2015.
33. Mahler DA, Kerwin E, Ayers T, et al. FLIGHT1 and FLIGHT2: Efficacy and Safety of QVA149 (Indacaterol/Glycopyrrolate) versus Its Monocomponents and Placebo in Patients with Chronic Obstructive Pulmonary Disease. *Am J Respir Crit Care Med*. 2015;192:1068–79.
34. Kerwin E, Hebert J, Gallagher N, et al. Efficacy and safety of NVA237 versus placebo and tiotropium in patients with COPD: the GLOW2 study. *Eur Respir J*. 2012;40:1106–14.
35. Mahler DA, D'Urzo A, Bateman ED, et al. Concurrent use of indacaterol plus tiotropium in patients with COPD provides superior bronchodilation compared with tiotropium alone: a randomised, double-blind comparison. *Thorax*. 2012;67:781–8.
36. Novartis. Efficacy and Safety of Indacaterol Plus Tiotropium Versus Tiotropium Alone in Patients With Chronic Obstructive Pulmonary Disease (INTRUST1) (NCT00846586). 2011. [Available from: <http://www.clinicaltrials.gov/ct2/show/results/NCT00846586>]. Accessed 2 Oct 2015.
37. Novartis. A randomized, double-blind, controlled, parallel group, 12-week treatment study to compare the efficacy and safety of the combination of indacaterol 150 µg once daily with open label tiotropium 18 µg once daily versus open label tiotropium 18 µg once daily in patients with moderate to severe chronic obstructive pulmonary disease. 2009. [Available from: [https://www.clinicaltrialsregister.eu/ctr-search/search?query=eudract\\_number:2008-006976-31](https://www.clinicaltrialsregister.eu/ctr-search/search?query=eudract_number:2008-006976-31)]. Accessed 8 Oct 2015.
38. Novartis. Efficacy and Safety of Indacaterol Plus Tiotropium Versus Tiotropium Alone in Patients With Chronic Obstructive Pulmonary Disease (INTRUST2) (NCT00877383). 2011. [Available from: <http://clinicaltrials.gov/ct2/show/NCT00877383>]. Accessed 2 Oct 2015.
39. Novartis. A randomized, double-blind, controlled, parallel group, 12-week treatment study to compare the efficacy and safety of the combination of indacaterol 150 µg once daily with open label tiotropium 18 µg once daily versus open label tiotropium 18 µg once daily in patients with moderate-to-severe chronic obstructive pulmonary disease. 2009. [Available from: <https://www.clinicaltrialsregister.eu/ctr-search/search?query=2008-008447-26>]. Accessed 8 Oct 2015.
40. Moita J, Barbara C, Cardoso J, et al. Tiotropium improves FEV1 in patients with COPD irrespective of smoking status. *Pulm Pharmacol Ther*. 2008;21:146–51.
41. Niewoehner DE, Rice K, Cote C, et al. Prevention of exacerbations of chronic obstructive pulmonary disease with tiotropium, a once-daily inhaled anticholinergic bronchodilator: a randomized trial. *Ann Intern Med*. 2005;143:317–26.
42. Singh D, Ferguson GT, Bolitschek J, et al. Tiotropium + olodaterol shows clinically meaningful improvements in quality of life. *Respir Med*. 2015;109:1312–9.
43. Buhl R, Gessner C, Schuermann W, et al. Efficacy and safety of once-daily QVA149 compared with the free combination of once-daily tiotropium plus twice-daily formoterol in patients with moderate-to-severe COPD (QUANTIFY): a randomised, non-inferiority study. *Thorax*. 2015;70:311–9.
44. Bateman ED, Ferguson GT, Barnes N, et al. Dual bronchodilation with QVA149 versus single bronchodilator therapy: the SHINE study. *Eur Respir J*. 2013;42:1484–94.
45. Novartis. A Study to Assess the Efficacy, Safety and Tolerability of Once-daily (q.d.) QVA149 in Patients With Moderate to Severe Chronic Obstructive Pulmonary Disease (COPD) (NCT01202188). 2013. [Available from: <http://ClinicalTrials.gov/show/NCT01202188>]. Accessed 2 Oct 2015.



46. Novartis. A 26-week treatment multi-center, randomized, doubleblind, parallel-group, placebo and active controlled (open label) study to assess the efficacy, safety and tolerability of QVA149 (110/50 µg q.d.) in patients with moderate to severe chronic obstructive pulmonary disease (COPD). 2013. [Available from: <https://www.clinicaltrialsregister.eu/ctr-search/search?query=2009-017772-25>]. Accessed 8 Oct 2015.
47. Wedzicha JA, Decramer M, Ficker JH, et al. Analysis of chronic obstructive pulmonary disease exacerbations with the dual bronchodilator QVA149 compared with glycopyrronium and tiotropium (SPARK): a randomised, double-blind, parallel-group study. *Lancet Respir Med*. 2013;1:199–209.
48. Novartis. Effect of QVA149 Versus NVA237 and Tiotropium on Chronic Obstructive Pulmonary Disorder (COPD) Exacerbations (NCT01120691). 2013. [Available from: <http://ClinicalTrials.gov/show/NCT01120691>]. Accessed 2 Oct 2015.
49. Novartis. A 64-week treatment, multi-center, randomized, double-blind, parallel-group, active controlled study to evaluate the effect of QVA149 (110/50 µg o.d.) vs NVA237 (50 µg o.d.) and open-label tiotropium (18 µg o.d.) on COPD exacerbations in patients with severe to very severe chronic obstructive pulmonary disease (COPD). 2014. [Available from: <https://www.clinicaltrialsregister.eu/ctr-search/search?query=2009-013256-69>]. Accessed 8 Oct 2015.
50. Tashkin DP, Pearle J, Iezzoni D, Varghese ST. Formoterol and tiotropium compared with tiotropium alone for treatment of COPD. *COPD*. 2009;6:17–25.
51. Wise RA, Anzueto A, Cotton D, et al. Tiotropium Respimat inhaler and the risk of death in COPD. *N Engl J Med*. 2013;369:1491–501.
52. Anzueto A, Wise R, Calverley P, et al. The Tiotropium Safety and Performance in Respimat® (TIOSPIR®) Trial: Spirometry Outcomes. *Respir Res*. 2015;16:107.
53. Tonnel AB, Perez T, Grosbois JM, et al. Effect of tiotropium on health-related quality of life as a primary efficacy endpoint in COPD. *Int J Chron Obstruct Pulmon Dis*. 2008;3:301–10.
54. Ferguson GT, Flezar M, Korn S, et al. Efficacy of Tiotropium + Olodaterol in Patients with Chronic Obstructive Pulmonary Disease by Initial Disease Severity and Treatment Intensity: A Post Hoc Analysis. *Adv Ther*. 2015;32:523–36.
55. Buhl R, Maltais F, Abrahams R, et al. Tiotropium and olodaterol fixed-dose combination versus mono-components in COPD (GOLD 2-4). *Eur Respir J*. 2015;45:969–79.
56. Troosters T, Sciurba FC, Decramer M, et al. Tiotropium in patients with moderate COPD naive to maintenance therapy: a randomised placebo-controlled trial. *NPJ Prim Care Respir Med*. 2014;24:14003.
57. Tashkin DP, Celli B, Senn S, et al. A 4-year trial of tiotropium in chronic obstructive pulmonary disease. *N Engl J Med*. 2008;359:1543–54.
58. Tashkin DP, Li N, Kleerup EC, et al. Acute bronchodilator responses decline progressively over 4 years in patients with moderate to very severe COPD. *Respir Res*. 2014;15:102.
59. Buhl R, Welte T, Vogelmeier C, et al. [Early treatment of COPD with tiotropium]. *Pneumologie*. 2012;66:589–95.
60. Tashkin DP, Celli BR, Decramer M, Lystig T, Liu D, Kesten S. Efficacy of tiotropium in COPD patients with FEV1 ≥ 60% participating in the UPLIFT® trial. *COPD*. 2012;9:289–96.
61. Celli B, Decramer M, Kesten S, et al. Mortality in the 4-year trial of tiotropium (UPLIFT) in patients with chronic obstructive pulmonary disease. *Am J Respir Crit Care Med*. 2009;180:948–55.
62. Verkindre C, Bart F, Aguilaniu B, et al. The effect of tiotropium on hyperinflation and exercise capacity in chronic obstructive pulmonary disease. *Respiration*. 2006;73:420–7.
63. Vogelmeier C, Kardos P, Harari S, Gans SJ, Stenglein S, Thirlwell J. Formoterol mono- and combination therapy with tiotropium in patients with COPD: a 6-month study. *Respir Med*. 2008;102:1511–20.
64. Voshaar T, Lapidus R, Maleki-Yazdi R, et al. A randomized study of tiotropium Respimat Soft Mist inhaler vs. ipratropium pMDI in COPD. *Respir Med*. 2008;102:32–41.
